# Supplementary material for: Ultrasound-Mediated Blood–Brain Barrier Disruption for Drug Delivery: A Systematic Review of Protocols, Efficacy, and Safety Outcomes from Preclinical and Clinical Studies
Source: MDPI journal article supplement (doi:10.3390/pharmaceutics14040833), 2022-04-11
Supplement: s1 [file s1]

**Table S2:** Database of extracted protocol, ultrasound parameter, efficacy, and safety assessment data from all included articles.

**MB:** microbubbles **f<sub>c</sub>:** transducer frequency; **PNP:** peak negative pressure; **MI:** mechanical index; **PD:** pulse duration; **PRF:** peak repetition frequency; **DC:** duty cycle; **SD:** sonication duration; **ISI:** Intersonication interval (period between sonications); **DS:** damage scores for assessing degree of haemorrhagic damage (0: no erythrocyte extravasation, 1: sparse erythrocyte extravasation; 2: petechial haemorrhage 3: extensive, haemorrhagic foci)<sup>[1]</sup>; **OLs:** overlapping locations; **NOLs** non-overlapping locations

**Numbers in bold indicate parameters varied and studied**

“T =” indicates the time from sonication of safety data acquisition

| First Author and Year Published | Subject                                     | Transducer Type and Manufacturer                                                                  | Transducer Application          |                                        | MBs Administered                                  |                                 | Ultrasound Parameters |                      |                      |         |          |         |        |                 |         |                  |                      | Comparative Degree of BBB Disruption Observed | Reported Adverse Safety Outcomes                                                                                                                        |                                                                                                                                                                                                                                                                                                                                                                                                                      |             |                                      |
|---------------------------------|---------------------------------------------|---------------------------------------------------------------------------------------------------|---------------------------------|----------------------------------------|---------------------------------------------------|---------------------------------|-----------------------|----------------------|----------------------|---------|----------|---------|--------|-----------------|---------|------------------|----------------------|-----------------------------------------------|---------------------------------------------------------------------------------------------------------------------------------------------------------|----------------------------------------------------------------------------------------------------------------------------------------------------------------------------------------------------------------------------------------------------------------------------------------------------------------------------------------------------------------------------------------------------------------------|-------------|--------------------------------------|
|                                 |                                             |                                                                                                   | Target(s)                       | Intact Skull vs Craniotomy Application | Type                                              | Dose                            | $f_c$ (MHz)           | PNP (MPa)            | MI                   | PD (ms) | PRF (Hz) | DC (%)  | SD (s) | # Sonications   | ISI (s) | # of US Sessions | Interession Interval |                                               | Macroscopic                                                                                                                                             | Histological                                                                                                                                                                                                                                                                                                                                                                                                         | Biochemical | Behavioural and Electrophysiological |
| Baghirov et al.<br>2018<br>[2]  | Mouse<br><i>(Metastatic Melanoma Model)</i> | Dual, single-element, focused transducers<br><br>FUS Instruments™                                 | Metastatic melanoma lesions     | Intact                                 | In-house, nanoparticle loaded MBs                 | 5000 µL/kg                      | 1.1                   | 0.31-0.34            | 0.30-0.32            | 10      | 0.33     | 0.33    | 300    | 1               | N/A     | 1                | -                    | N/A                                           | Some evidence of erythrocyte extravasation<br><br><i>T=immediately following sonication</i>                                                             | DS=1-2<br><br><i>T=2 hours</i>                                                                                                                                                                                                                                                                                                                                                                                       | -           | -                                    |
| Baseri et al.<br>2010<br>[3]    | Mouse                                       | Single-element, focused transducer<br><br>Riverside Research Institute™                           | Hippocampus                     | Intact                                 | Definity® MBs                                     | 50 µL/kg                        | 1.53                  | <b>0.30-0.98</b>     | <b>0.24-0.79</b>     | 20      | 10       | 20      | 30     | 2               | 30      | 1                | -                    | ++                                            | <b>0.46 + 0.61 + 0.75 MPa:</b> No evidence of gross haemorrhage<br><br><b>0.98 MPa:</b> Gross haemorrhagic and tissue damage<br><br><i>T=30 minutes</i> | <b>0.30 MPa:</b> DS=0-1 (few micro-vacuolations)<br><br><b>0.46 MPa:</b> DS=1-2 (more dark neurons + micro-vacuolations)<br><br><b>0.61 MPa:</b> DS=2 (more dark neurons + micro-vacuolations)<br><br><b>0.75 MPa:</b> DS=2 (significantly higher number of dark neurons + micro-vacuolations)<br><br>No significant differences in adverse events @ 5 hours across all PNPs<br><br><i>T= 40 minutes and 5 hours</i> |             |                                      |
| Bing et al.<br>2009<br>[4]      | Mouse                                       | Siemens Sonoline™ Antares VF10-5, unfocused, diagnostic scanner<br><br>Siemens Medical Solutions™ | Subcortical, cerebral locations | Intact                                 | Definity® MBs                                     | 1200 µL/kg                      | 5.7                   | <b>0.72 or 1.67</b>  | <b>0.3 or 0.7</b>    | 20      | 10       | 20      | 30     | 3<br><i>OLs</i> | 30      | 1                | -                    | +                                             | -                                                                                                                                                       | <b>0.72 + 1.67MPa:</b> DS=0-1                                                                                                                                                                                                                                                                                                                                                                                        | -           | -                                    |
|                                 |                                             |                                                                                                   |                                 |                                        |                                                   | 1200 µL/kg                      | 5.7                   | 3.10                 | 1.3                  | 0.00035 | 36       | 0.00126 | 30     | 5<br><i>OLs</i> | 30      | 1                | -                    | N/A                                           | -                                                                                                                                                       | DS=2                                                                                                                                                                                                                                                                                                                                                                                                                 | -           | -                                    |
| Chen et al.<br>2013<br>[5]      | Mouse                                       | Single-element, focused transducer<br><br>Imasonic™                                               | Hippocampus                     | Intact                                 | <b>In-house, MBs</b>                              | 4.8 x 10 <sup>7</sup> MBs/mouse | 1.5                   | <b>0.45 and 0.60</b> | <b>0.55 and 0.73</b> | 6.7     | 5        | 3.35    | 3000   | 1               | -       | 1                | -                    | +                                             | -                                                                                                                                                       | <b>0.60MPa:</b> DS=1; few dark neurons<br><br><i>T=1 hour</i>                                                                                                                                                                                                                                                                                                                                                        | -           | -                                    |
|                                 |                                             |                                                                                                   |                                 |                                        | <b>In-house, acoustically active nanodroplets</b> | 3 x 10 <sup>8</sup> NDs/mouse   | 1.5                   | <b>0.45 and 0.60</b> | <b>0.55 and 0.73</b> | 6.7     | 5        | 3.35    | 3000   | 1               | -       | 1                | -                    | +                                             | -                                                                                                                                                       | No significant adverse events reported                                                                                                                                                                                                                                                                                                                                                                               | -           | -                                    |

|                             |                                                          |                                                                         |                                  |        |                                          |                    |      |              |              |        |              |         |           |                  |    |   |   |       |                                                                                             |                                                                                                                   |   |   |
|-----------------------------|----------------------------------------------------------|-------------------------------------------------------------------------|----------------------------------|--------|------------------------------------------|--------------------|------|--------------|--------------|--------|--------------|---------|-----------|------------------|----|---|---|-------|---------------------------------------------------------------------------------------------|-------------------------------------------------------------------------------------------------------------------|---|---|
| Chen et al.<br>2014<br>[6]  | Mouse                                                    | Single-element, focused transducer<br><br>Imasonic™                     | Hippocampus                      | Intact | Definity® MBs                            | 50 µL/kg           | 1.5  | 0.51 or 0.84 | 0.42 or 0.69 | 1.3    | 5            | 0.65    | 660       | 1                | -  | 1 | - | ++    | -                                                                                           | 0.51MPa: DS=0 (all dextrans)<br><br>0.84MPa: DS=0 (3 and 70kDa); DS=1 (500 and 2000kDa)<br><br><i>T=9 minutes</i> |   |   |
| Choi et al.<br>2010<br>[7]  | Mouse                                                    | Single-element, focused transducer<br><br>Riverside Research Institute™ | Lateral thalamus and hippocampus | Intact | In-house, 1-2µm MBs                      | 2.13 x 10 µL/mouse | 1.5  | 0.46-0.61    | 0.38-0.50    | 20     | 10           | 20      | 30        | 2<br><i>NOLs</i> | 30 | 1 | - | +~+++ | -                                                                                           | 0.46MPa: DS= 0-1<br><br><i>T=30 minutes</i>                                                                       | - | - |
|                             |                                                          |                                                                         |                                  |        | In-house, 4-5µm MBs                      | 2.13 x 10 µL/mouse | 1.5  | 0.30-0.61    | 0.24-0.50    | 20     | 10           | 20      | 30        | 2<br><i>NOLs</i> | 30 | 1 | - | +     | -                                                                                           | 0.30MPa: DS=1<br><br><i>T=30 minutes</i>                                                                          | - | - |
| Choi et al.<br>2011<br>[8]  | Mouse                                                    | Single-element, focused transducer<br><br>Riverside Research Institute™ | Lateral thalamus and hippocampus | Intact | Definity® MBs<br><br>30 vs 180s infusion | 10-250 µL/kg       | 1.53 | 0.46         | 0.37         | 20     | 10           | 120     | 660       | 1                | -  | 1 | - | +     | -                                                                                           | No significant adverse events reported<br><br><i>SD=30s: T=18.5 minutes</i><br><i>SD=660s: T=10 minutes</i>       | - | - |
|                             |                                                          |                                                                         |                                  |        |                                          | 50 µL/kg           | 1.53 | 0.46         | 0.37         | 0.1-30 | 10           | 0.1-30  | 660       | 1                | -  | 1 | - | ++    |                                                                                             |                                                                                                                   |   |   |
|                             |                                                          |                                                                         |                                  |        |                                          | 50 µL/kg           | 1.53 | 0.46         | 0.37         | 20     | 1-25         | 10-50   | 660       | 1                | -  | 1 | - | 0     |                                                                                             |                                                                                                                   |   |   |
|                             |                                                          |                                                                         |                                  |        |                                          | 50 µL/kg           | 1.53 | 0.46         | 0.37         | 20     | 10           | 20      | 30 or 660 | 1                | -  | 1 | - | 0     |                                                                                             |                                                                                                                   |   |   |
| Choi et al.<br>2011<br>[9]  | Mouse                                                    | Single-element, focused transducer<br><br>Imasonic™                     | Lateral thalamus and hippocampus | Intact | Definity® MBs                            | 50 µL/kg           | 1.5  | 0.51         | 0.42         | 0.0023 | 6250-100,000 | 1.44-23 | 660       | 1                | -  | 1 | - | +     | -                                                                                           | No significant adverse events reported                                                                            | - | - |
| Choi et al.<br>2008<br>[10] | Mouse<br>( <i>Healthy or APP/PS1 Alzheimer's model</i> ) | r                                                                       | Hippocampus                      | Intact | SonoVue® MBs                             | 25 µL/mouse        | 1.53 | 0.6          | 0.49         | 20     | 10           | 20      | 30        | 2<br><i>NOLs</i> | 30 | 1 | - | N/A   | No significant adverse events reported<br><br><i>T=immediately after and 22 hours after</i> | No significant adverse events reported<br><br><i>T=1 hour</i>                                                     | - | - |
| Choi et al.<br>2010<br>[11] | Mouse                                                    | Single-element, focused transducer<br><br>Riverside Research Institute™ | Hippocampus                      | Intact | SonoVue® MBs                             | 25 µL/mouse        | 1.53 | 0.57         | 0.46         | 20     | 10           | 20      | 30        | 2<br><i>OLs</i>  | 30 | 1 | - | N/A   | -                                                                                           | DS=1<br><br><i>T=30 minutes</i>                                                                                   | - | - |

|                                         |                                                           |                                                            |                                         |        |                                         |                                                                                  |      |                   |                     |    |   |   |     |                      |                   |               |   |        |                                                                                             |                                                                                                                                                                                                                              |                                                                                                                                                                                                                                  |                                                                                                                                                                                                                                                                |
|-----------------------------------------|-----------------------------------------------------------|------------------------------------------------------------|-----------------------------------------|--------|-----------------------------------------|----------------------------------------------------------------------------------|------|-------------------|---------------------|----|---|---|-----|----------------------|-------------------|---------------|---|--------|---------------------------------------------------------------------------------------------|------------------------------------------------------------------------------------------------------------------------------------------------------------------------------------------------------------------------------|----------------------------------------------------------------------------------------------------------------------------------------------------------------------------------------------------------------------------------|----------------------------------------------------------------------------------------------------------------------------------------------------------------------------------------------------------------------------------------------------------------|
| <b>Englander et al.</b><br>2021<br>[12] | Mouse<br>( <i>DIPG model</i> )                            | Single-element, focused transducer<br><br>Imasonic™        | Tumour site                             | Intact | SonoVue® MBs<br><br>Or<br>Definity® MBs | 100 µL                                                                           | 1.5  | 0.7               | 0.57                | 10 | 5 | 5 | 120 | 4<br><br><i>NOLs</i> | Immediately after | <b>1 or 2</b> | - | N/A    | No significant adverse events reported<br><br><i>T &lt;2 hours</i>                          | No significant adverse events reported<br><br><i>T &lt;5 hours</i>                                                                                                                                                           | -                                                                                                                                                                                                                                | <b>1 US session:</b> No changes in grip strength<br><br><b>2 US sessions:</b> Transient bradycardia following MB administration; minor improvement in grip strength likely attributable to repeat testing<br><br>No physiological assessments for 1 US session |
| <b>Jordao et al.</b><br>2013<br>[13]    | Mouse<br>( <i>Healthy and TgCRND8 Alzheimer's model</i> ) | Single-element focused transducer<br><br>FUS Instruments™  | Cortical targets                        | Intact | Definity® MBs                           | <b>40 µL/kg</b> (health mice)<br><br><b>Or</b><br><b>80 µL/kg</b> (TgCRND8 mice) | 0.5  | 0.3               | 0.42                | 10 | 1 | 1 | 120 | 4<br><br><i>NOLs</i> | -                 | 1             | - | 0      | -                                                                                           | <b>All mice:</b> Increased astrogliosis @ day 4 and 15; increased glial activation @ 4 hours, peaking @ 4 days, resolving @ 15 days; increased IgG/IgM accumulation at sonicated site<br><br><i>T=4 hours, 4 and 15 days</i> | <b>All mice:</b> Increased proteomic expression of Iba1 and GFAP, with same time points as seen in histology<br><br><b>TgCRND8:</b> Reduction in amyloid-beta plaque burden within 4 days<br><br><i>T=4 hours, 4 and 15 days</i> | -                                                                                                                                                                                                                                                              |
| <b>Kinoshita et al.</b><br>2006<br>[14] | Mouse                                                     | Single-element, focused transducer<br><br>In-house         | Midline location                        | Intact | Optison® MBs                            | 50 µL                                                                            | 0.69 | <b>0.6 or 0.8</b> | <b>0.72 or 0.96</b> | 10 | 1 | 1 | 40  | 1                    | -                 | 1             | - | +      | <b>0.8MPa:</b> Small, scattered petechiae<br><br><i>T=4 hours</i>                           | <b>0.6MPa:</b> DS=1; some apoptotic cells<br><br><b>0.8MPa:</b> DS=2; some apoptotic cells<br><br><i>T=4 hours</i>                                                                                                           | -                                                                                                                                                                                                                                | -                                                                                                                                                                                                                                                              |
| <b>Kinoshita et al.</b><br>2006<br>[15] | Mouse                                                     | Single-element, focused transducer<br><br>In-house         | Hippocampus and basal ganglia           | Intact | Optison® MBs                            | <b>10 µL</b>                                                                     | 0.69 | <b>0.6 or 0.8</b> | <b>0.72 or 0.96</b> | 10 | 1 | 1 | 40  | 1                    | -                 | 1             | - | +      | No significant adverse events reported<br><br><i>T=3 hours</i>                              | <b>0.6MPa:</b> DS=0-1<br><br><i>T=3 hours</i>                                                                                                                                                                                | -                                                                                                                                                                                                                                | -                                                                                                                                                                                                                                                              |
|                                         |                                                           |                                                            |                                         |        |                                         | <b>50 µL</b>                                                                     | 0.69 | <b>0.8-1.1</b>    | <b>0.96-1.32</b>    | 10 | 1 | 1 | 40  | 1                    | -                 | 1             | - | ++     | <b>1.1MPa:</b> Petechial haemorrhages<br><br><i>T=3 hours</i>                               | <b>0.8MPa:</b> DS=1-2<br><br><b>0.9 + 1.1MPa:</b> DS=2-3<br><br><i>T=3 hours</i>                                                                                                                                             | -                                                                                                                                                                                                                                | -                                                                                                                                                                                                                                                              |
| <b>Lapin et al.</b><br>2020<br>[16]     | Mouse                                                     | Single-element, focused transducer<br><br>FUS Instruments™ | Hippocampus and frontal cortex location |        | Definity® MBs                           | <b>27-196 µL/kg</b>                                                              | 1.43 | <b>0.56</b>       | 0.47                | 10 | 1 | 1 | 30  | 8<br><br><i>NOLs</i> | 30                | 1             | - | + - ++ | <b>196 µL/kg:</b> T2 hypointense (haemorrhagic) lesions detected<br><br><i>T=40 minutes</i> | -                                                                                                                                                                                                                            | -                                                                                                                                                                                                                                | -                                                                                                                                                                                                                                                              |
|                                         |                                                           |                                                            |                                         |        |                                         | <b>27-391 µL/kg</b><br><br><i>Long Infusion</i>                                  | 1.43 | <b>0.48</b>       | 0.4                 | 10 | 1 | 1 | 30  | 8<br><br><i>NOLs</i> | 30                | 1             | - | +      | No significant adverse events reported<br><br><i>T=40 minutes</i>                           | -                                                                                                                                                                                                                            | -                                                                                                                                                                                                                                | -                                                                                                                                                                                                                                                              |

|                                  |                                                      |                                                           |                                      |        |                                                                       |                                                  |      |              |                                                              |       |       |       |     |                  |     |   |    |                                                                                     |                                                                                                                         |                                                                                                    |   |   |
|----------------------------------|------------------------------------------------------|-----------------------------------------------------------|--------------------------------------|--------|-----------------------------------------------------------------------|--------------------------------------------------|------|--------------|--------------------------------------------------------------|-------|-------|-------|-----|------------------|-----|---|----|-------------------------------------------------------------------------------------|-------------------------------------------------------------------------------------------------------------------------|----------------------------------------------------------------------------------------------------|---|---|
|                                  |                                                      |                                                           |                                      |        |                                                                       | 196-703 $\mu\text{L/kg}$<br><i>Long Infusion</i> | 1.43 | 0.39         | 0.33                                                         | 10    | 1     | 1     | 30  | 8<br><i>NOLs</i> | 30  | 1 | -  | +                                                                                   | 632 $\mu\text{L/kg}$ + 703 $\mu\text{L/kg}$ : T2 hypointense (haemorrhagic) lesions detected<br><br><i>T=40 minutes</i> | -                                                                                                  | - | - |
|                                  |                                                      |                                                           |                                      |        |                                                                       | 87 or 179 $\mu\text{L/kg}$<br><i>One bolus</i>   | 1.43 | 0.39         | 0.33                                                         | 10    | 1     | 1     | 30  | 8<br><i>NOLs</i> | 120 | 1 | -  | +                                                                                   | 179 $\mu\text{L/kg}$ : T2 hypointense (haemorrhagic) lesions detected<br><br><i>T=1 hour</i>                            | -                                                                                                  | - | - |
| Liu et al.<br>2014<br>[17]       | Mouse<br><br>( <i>Healthy and U87 Glioma model</i> ) | Single-element, focused transducer<br><br>Sonic Concepts™ | Tumoral site                         | Intact | SonoVue® MBs                                                          | 4 $\mu\text{L}/\text{mouse}$                     | 0.5  | 0.3 or 0.7   | 0.42 or 0.99                                                 | 10    | 1     | 1     | 60  | 1                | -   | 1 | -  | +++                                                                                 | -                                                                                                                       | 0.3MPa: DS=0<br>0.7MPa: DS=3<br><br><i>T=4 hours</i>                                               | - | - |
| McDannold et al.<br>2017<br>[18] | Mouse                                                | Single-element, focused transducer<br><br>In-house        | Putamen + Thalamus                   | Intact | Optison® MBs<br><br>Air vs O <sub>2</sub> carrier gas for anaesthetic | 200 $\mu\text{L/kg}$                             | 0.69 | 0.34-0.54    | 0.41-0.65                                                    | 10    | 1     | 1     | 120 | 2<br><i>NOLs</i> | 0   | 1 | -  | +                                                                                   | -                                                                                                                       | 0.34-0.36MPa: DS=0-1<br>0.46-0.54MPa: DS=1-2<br><br>Air > O <sub>2</sub><br><br><i>T=1-2 hours</i> | - | - |
| McMahon et al.<br>2020<br>[19]   | Mouse                                                | Single-element, focused transducer<br><br>In-house        | Striatum and frontal cortex location | Intact | Definity® MBs                                                         | 40 $\mu\text{L/kg}$                              | 1.78 | 0.93 or 1.87 | 0.7 or 1.4<br><br>( <i>Phasic pulses over a 10ms burst</i> ) | 1250  | 0.625 | 250   | 3   | 350              | 1   | - | ++ | 1.87 MPa: SWI hypointense (haemorrhagic) lesions detected<br><br><i>T=6 minutes</i> | 0.93MPa: DS=1-2<br><br><i>T=4 hours</i>                                                                                 | -                                                                                                  | - |   |
|                                  |                                                      |                                                           |                                      |        |                                                                       |                                                  | 1.78 | 0.33-0.93    | 0.25-0.70<br><br>( <i>Tonic pulse</i> )                      | 10    | 0.5   | 0.5   | 250 | 3                | 350 | 1 | -  | 0.93 MPa: SWI hypointense (haemorrhagic) lesions detected<br><br><i>T=6 minutes</i> | 0.33 and 0.40MPa: DS=1<br><br><i>T=4 hours</i>                                                                          |                                                                                                    |   |   |
| Morse et al.<br>2022<br>[20]     | Mouse                                                | Single-element, focused transducer<br><br>Sonic Concepts  | Hippocampus                          | Intact | SonoVue® MBs<br><br><i>30s infusion</i>                               | 5000 $\mu\text{L/kg}$                            | 1    | 0.53         | 0.53                                                         | 0.005 | 1250  | 0.625 | 250 | 1                | -   | 1 | -  | +                                                                                   |                                                                                                                         | 0.53 MPa: DS=0<br><br><i>T= 0 or 2 hours</i>                                                       | - | - |
|                                  |                                                      |                                                           |                                      |        |                                                                       |                                                  | 1    | 0.35 or 0.53 | 0.35 or 0.53                                                 | 10    | 0.5   | 0.5   | 250 | 1                | -   | 1 | -  |                                                                                     | -                                                                                                                       | 0.35 MPa: DS=1<br>0.53 MPa: DS=1-2                                                                 | - | - |

|                                      |                                           |                                                                      |                                |            |                                  |                            |      |                       |              |                                                |      |       |       |                           |               |      |          |       |                                                                                               |                                                                                                       |   |                                                                                                                       |
|--------------------------------------|-------------------------------------------|----------------------------------------------------------------------|--------------------------------|------------|----------------------------------|----------------------------|------|-----------------------|--------------|------------------------------------------------|------|-------|-------|---------------------------|---------------|------|----------|-------|-----------------------------------------------------------------------------------------------|-------------------------------------------------------------------------------------------------------|---|-----------------------------------------------------------------------------------------------------------------------|
|                                      |                                           |                                                                      |                                |            |                                  |                            |      |                       |              | (Tonic pulse)                                  |      |       |       |                           |               |      |          |       |                                                                                               |                                                                                                       |   |                                                                                                                       |
| Morse et al.<br><br>2019<br>[21]     | Mouse                                     | Single-element, focused transducer<br><br>Sonic Concepts™            | Hippocampus                    | Intact     | SonoVue® MBs<br><br>30s infusion | 100 μL                     | 1    | 0.35                  | 0.35         | 0.005<br><br>(Phasic pulses over a 10ms burst) | 1250 | 0.625 | 250   | 1                         | -             | 1    | -        | +     | -                                                                                             | Tonic pulses: Greater erythrocyte extravasation                                                       | - | -                                                                                                                     |
|                                      |                                           |                                                                      |                                |            |                                  |                            | 1    | 0.35                  | 0.35         | 10<br><br>(Tonic pulse)                        | 0.5  | 0.5   | 250   | 1                         | -             | 1    | -        |       |                                                                                               |                                                                                                       |   |                                                                                                                       |
| Olumolade et al.<br><br>2016<br>[22] | Mouse                                     | Single-element, focused transducer<br><br>Manufacturer not specified | Striatum                       | Intact     | In-house MBs (first 3 weeks)     | 1000 μL/kg                 | 1.5  | 0.45                  | 0.37         | 0.33                                           | 10   | 0.33  | 60    | 1                         | -             | 2-10 | Biweekly | +     | -                                                                                             | No significant adverse events reported<br><br>T=1 month                                               | - | No changes in open field and rotarod performance tests                                                                |
|                                      |                                           |                                                                      |                                |            | Definity® MBs (remaining weeks)  | 1000 μL/kg                 | 1.5  | 0.47                  | 0.37         | 0.33                                           | 10   | 0.33  | 60    | 1                         | -             | 2-6  | Monthly  | +     | -                                                                                             | No significant adverse events reported<br><br>T=1 month                                               | - | No changes in open field and rotarod performance tests                                                                |
|                                      |                                           |                                                                      |                                |            |                                  | 1000 μL/kg                 | 1.5  | 1.5                   | 1.22         | 6.67                                           | 10   | 6.67  | 60    | 1                         | -             | 1    | -        | ++    | -                                                                                             | DS=2; some neuronal loss<br><br>T=1 day                                                               | - | Transient hypoactivity, and loss of balance/coordination<br><br>Rotational affinity to side ipsilateral of sonication |
| Omata et al.<br><br>2019<br>[23]     | Mouse                                     | Single-element, focused transducer<br><br>Nepa Gene Co.™             | Subcortical, cerebral location | Intact     | Inhouse MBs (C3F6)               | 3 x 10 <sup>9</sup> MBs/kg | 3.0  | 0.5 W/cm <sup>2</sup> |              | 50                                             | 10   | 50    | 180   | 1                         | -             | 1    | -        | + -++ | -                                                                                             | No significant adverse events reported<br><br>T=1 day                                                 | - | -                                                                                                                     |
|                                      |                                           |                                                                      |                                |            | Inhouse MBs (C4F10)              |                            |      |                       |              |                                                |      |       |       |                           |               |      |          |       |                                                                                               |                                                                                                       |   |                                                                                                                       |
|                                      |                                           |                                                                      |                                |            | Inhouse MBs (SF6)                |                            |      |                       |              |                                                |      |       |       |                           |               |      |          |       |                                                                                               |                                                                                                       |   |                                                                                                                       |
|                                      |                                           |                                                                      |                                |            | Sonazoid® MBs                    |                            |      |                       |              |                                                |      |       |       |                           |               |      |          |       |                                                                                               |                                                                                                       |   |                                                                                                                       |
|                                      |                                           |                                                                      |                                |            | SonoVue® MBs                     |                            |      |                       |              |                                                |      |       |       |                           |               |      |          |       |                                                                                               |                                                                                                       |   |                                                                                                                       |
| Raymond et al.<br><br>2007<br>[24]   | Mouse                                     | Single-element, focused transducer<br><br>In-house                   | Subcortical, cerebral location | Craniotomy | Optison® MBs                     | 300 μL/kg                  | 1.03 | 0.2                   | 0.20         | 10                                             | 1    | 1     | 45-60 | 1<br><br>or<br><br>2 NOLs | Not specified | 1    | -        | N/A   | Superficial, petechial haemorrhages observed near craniotomy site (also observed in controls) | DS=2<br><br>T=1 hour                                                                                  | - | -                                                                                                                     |
|                                      |                                           |                                                                      |                                |            |                                  |                            |      |                       |              |                                                |      |       |       |                           |               |      |          |       |                                                                                               |                                                                                                       |   |                                                                                                                       |
| Raymond et al.<br><br>2008<br>[25]   | Mouse<br><br>(APPsw<br>e:PSEN1<br>dE9 and | Single-element, focused transducer<br><br>In-house                   | Hippocampus                    | Intact     | Optison® MBs                     | 30-50 μL/mouse             | 0.69 | 0.67 or 0.8           | 0.81 or 0.96 | 10                                             | 1    | 1     | 40-45 | 1                         | -             | 1    | -        | +     | -                                                                                             | 0.67 MPa: Scattered petechiae in 1/7 treated regions<br><br>0.8 MPa: Scattered petechiae in 2 regions | - | -                                                                                                                     |

|                                          | <i>PDAPP transgenic Alzheimer disease models)</i> |                                                                        |                                |        | Definity® MBs                       | 10 μL/mouse                   |      |                            |                            |       |    |       |     |   |   |   |   |      |                                                                                                                                                                                                                      | <i>T=3-6 hours</i>                                                                                                                                                                                               |   |   |
|------------------------------------------|---------------------------------------------------|------------------------------------------------------------------------|--------------------------------|--------|-------------------------------------|-------------------------------|------|----------------------------|----------------------------|-------|----|-------|-----|---|---|---|---|------|----------------------------------------------------------------------------------------------------------------------------------------------------------------------------------------------------------------------|------------------------------------------------------------------------------------------------------------------------------------------------------------------------------------------------------------------|---|---|
| Samiotaki et al.<br><br>2012<br><br>[26] | Mouse                                             | Single-element, focused transducer<br><br>Imasonic™                    | Hippocampus                    | Intact | In-house MBs<br><br><i>(1-2μm)</i>  | 10 <sup>7</sup> MBs/kg        | 1.53 | <b>0.45</b> or <b>0.6</b>  | <b>0.36</b> or <b>0.49</b> | 0.07  | 10 | 0.07  | 60  | 1 | - | 1 | - | +    | -                                                                                                                                                                                                                    | Histological findings not reported<br><br><i>T=7 days</i>                                                                                                                                                        |   | - |
|                                          |                                                   |                                                                        |                                |        | In-house MBs<br><br><i>(4-5μm)</i>  | 10 <sup>7</sup> MBs/kg        | 1.53 | <b>0.3-0.6</b>             | <b>0.24-0.49</b>           | 0.07  | 10 | 0.07  | 60  | 1 | - | 1 | - | +-++ | -                                                                                                                                                                                                                    | Some cell loss detected at dentate gyrus and CA1<br><br><i>T=7 days</i>                                                                                                                                          | - | - |
|                                          |                                                   |                                                                        |                                |        | In-house MBs<br><br><i>(6-8μm)</i>  | 10 <sup>7</sup> MBs/kg        | 1.53 | <b>0.3-0.6</b>             | <b>0.24-0.49</b>           | 0.07  | 10 | 0.07  | 60  | 1 | - | 1 | - | ++   | -                                                                                                                                                                                                                    | Some cell loss detected at dentate gyrus and CA1<br><br><i>T=7 days</i>                                                                                                                                          | - | - |
| Shen et al.<br><br>2016<br><br>[27]      | Mouse                                             | Single-element, focused transducer<br><br>Manufacturer not specified   | Subcortical, cerebral location | Intact | In-house MBs                        | <b>100 μL/kg</b>              | 1.28 | <b>0.53</b> or <b>0.64</b> | <b>0.47</b> or <b>0.57</b> | 7.8   | 1  | 0.78  | 60  | 1 | - | 1 | - | ++   | -                                                                                                                                                                                                                    | <b>0.64MPa:</b> DS=1-2<br><br><i>T=4 hours</i>                                                                                                                                                                   | - | - |
|                                          |                                                   |                                                                        |                                |        |                                     | <b>500 μL/kg</b>              | 1.28 | <b>0.53</b> or <b>0.64</b> | <b>0.47</b> or <b>0.57</b> | 7.8   | 1  | 0.78  | 60  | 1 | - | 1 | - | ++   | -                                                                                                                                                                                                                    | <b>0.53 MPa:</b> DS=1<br><b>0.64 MPa:</b> DS=2<br><br><i>T=4 hours</i>                                                                                                                                           | - | - |
| Sierra et al.<br><br>2017<br><br>[28]    | Mouse                                             | Single-element, focused transducer<br><br>Imasonic™                    | Striatum                       | Intact | In-house fluorescently labelled MBs | 4 x 10 <sup>9</sup> MBs/mouse | 1.5  | <b>0.60</b> or <b>0.75</b> | <b>0.49-0.61</b>           | 6.56  | 5  | 3.28  | 300 | 1 | - | 1 | - | ++   | <b>0.60 MPa:</b> T2 hyperintensity (oedema) detected acutely<br><br><b>0.75 MPa:</b> Transient T2 hyperintensity (oedema) reversing within 3-4 days<br><br><i>T=20 minutes, and daily for 7 days (0.75 MPa only)</i> | <b>0.60MPa:</b> DS=1-2 (resolved after 1 week)<br><br><b>0.75MPa:</b> DS=1-2 (resolved after 1 week) microglial activation 1 week after sonication<br><br><i>All PNPs: T=1 week<br/>0.6 + 0.75MPa: T=2 hours</i> | - | - |
| Vlachos et al.<br><br>2011<br><br>[29]   | Mouse                                             | Single-element focused transducer<br><br>Riverside Research Institute™ | Hippocampus                    | Intact | In-house MBs<br><br><i>(1-2μm)</i>  | 1x10 <sup>7</sup> MBs/mouse   | 1.53 | <b>0.45-0.60</b>           | <b>0.36-0.49</b>           | 0.067 | 10 | 0.067 | 60  | 1 | - | 1 | - | +    | No significant adverse events reported<br><br><i>T=2 hours</i>                                                                                                                                                       | <b>0.45 + 0.60 MPa:</b> No significant adverse events reported<br><br><i>T=7 days</i>                                                                                                                            | - | - |
|                                          |                                                   |                                                                        |                                |        | In-house MBs<br><br><i>(4-5μm)</i>  | x10 <sup>7</sup> MBs/mouse    | 1.53 | <b>0.30-0.60</b>           | <b>0.24-0.49</b>           | 0.067 | 10 | 0.067 | 60  | 1 | - | 1 | - | ++   | No significant adverse events reported<br><br><b>0.60 MPa:</b> Hypointense artefact not correlated w/ histology                                                                                                      | <b>0.30 MPa:</b> No significant adverse events reported<br><br><b>0.45 MPa + 0.60 MPa:</b> Cell loss in granular layer; sparse dark neurons; no microhaemorrhagic change                                         | - | - |

|                                         |                                                    |                                                                                              |                                  |        |                          |                                        |      |                     |                     |                        |    |       |               |                                |         |          |              |     |                                                                                                                         |                                                                                                                                                                                                                         |   |                                                                |
|-----------------------------------------|----------------------------------------------------|----------------------------------------------------------------------------------------------|----------------------------------|--------|--------------------------|----------------------------------------|------|---------------------|---------------------|------------------------|----|-------|---------------|--------------------------------|---------|----------|--------------|-----|-------------------------------------------------------------------------------------------------------------------------|-------------------------------------------------------------------------------------------------------------------------------------------------------------------------------------------------------------------------|---|----------------------------------------------------------------|
|                                         |                                                    |                                                                                              |                                  |        | In-house MBs<br>(6-8 µm) | x10 <sup>7</sup> MBs/<br>mouse         | 1.53 | <b>0.30-0.60</b>    | <b>0.24-0.49</b>    | 0.067                  | 10 | 0.067 | 60            | 1                              | -       | 1        | -            | +++ | No significant adverse events reported<br><br><b>0.45 + 0.60 MPa:</b> Hypointense artefacts not correlated w/ histology | <b>0.30 + 0.45 MPa:</b> No significant adverse events reported<br><br><b>0.60 MPa:</b> Cell loss; multiple dark neurons; no microhaemorrhagic change                                                                    | - | -                                                              |
| <b>Wu et al.</b><br>2014<br>[30]        | Mouse<br>(4T1- <i>luc2</i> breast cancer model)    | Single-element, focused transducer<br><br>Sonic Concepts™                                    | Tumour site                      | Intact | Not administered         |                                        | 0.5  | 0.97                | 1.37                | Continuous application |    |       | 600           | 1                              | -       | 1        | -            | N/A | -                                                                                                                       | Significant number of apoptotic cells<br><br><i>T=5 days</i>                                                                                                                                                            | - | -                                                              |
| <b>Zhang, D. et al.</b><br>2020<br>[31] | Mouse<br>( <i>Healthy and PDCL glioma models</i> ) | SonoCloud® single-element, unfocused transducer                                              | Somatosensory cortex tumour site | Intact | Lumason® MBs             | 7500 µL/kg                             | 1.05 | 0.3                 | 0.29                | 23.8                   | 1  | 2.38  | 120           | 1                              | -       | <b>1</b> | -            | N/A | -                                                                                                                       | DS=0-2 (few instances of white matter vacuolation)<br><br><i>T=21 days</i>                                                                                                                                              | - | -                                                              |
|                                         |                                                    | CarThera™                                                                                    |                                  |        |                          | 7500 µL/kg                             | 1.05 | 0.3                 | 0.29                | 23.8                   | 1  | 2.38  | 120           | 1                              | -       | <b>8</b> | Over 3 weeks | N/A | -                                                                                                                       | DS=0-2 (white matter vacuolation + hemosiderin laden macrophages)<br><br><i>T=21 days</i>                                                                                                                               | - | -                                                              |
| <b>Zhao, B. et al.</b><br>2018<br>[32]  | Mouse                                              | Vivid E9 M5S-D® multi element phase array, unfocused diagnostic transducer<br><br>GE Health™ | Striatum                         | Intact | In-house MBs             | <b>0.5-3x 10<sup>7</sup> MBs/mouse</b> | 1.5  | 0.98                | 0.8                 | Continuous delivery    |    |       | 180           | 1                              | -       | 1        | -            | +++ | -                                                                                                                       | <b>0.5-1 x10<sup>7</sup> MB:</b> DS=0-1<br><br><b>2 x10<sup>7</sup> MB:</b> DS=2 (ischaemic neurons, slight vacuolisation)<br><br><b>3 x10<sup>7</sup> MB:</b> DS=2-3 (extensive neuronal loss)<br><br><i>T=6 hours</i> | - | -                                                              |
|                                         |                                                    |                                                                                              |                                  |        |                          | 1 x 10 <sup>7</sup> MBs/mouse          | 1.5  | <b>0.49-0.98</b>    | <b>0.4-0.8</b>      | Continuous delivery    |    |       | 180           | 1                              | -       | 1        | -            | ++  | -                                                                                                                       | <b>MI=0.4:</b> DS=0<br><b>MI=0.6:</b> DS=1<br><b>MI=0.8:</b> DS=1<br><br><i>T=6 hours</i>                                                                                                                               | - | -                                                              |
|                                         |                                                    |                                                                                              |                                  |        |                          | 1 x 10 <sup>7</sup> MBs/mouse          | 1.5  | 0.98                | 0.8                 | Continuous delivery    |    |       | <b>60-240</b> | 1                              | -       | 1        | -            | +++ | -                                                                                                                       | <b>SD=60s:</b> SD=1<br><b>SD=120s:</b> SD=1<br><b>SD=180s:</b> SD=1-2<br><b>SD=240s:</b> DS=2 (slight vacuolization)<br><br><i>T=6 hours</i>                                                                            | - | -                                                              |
| <b>Ali et al.</b><br>2018<br>[33]       | Rat                                                | Single-element focused transducer<br><br>In-house                                            | Pons                             | Intact | Definity® MBs            | 20 µL/kg                               | 1.68 | 1.1                 | 0.85                | 10                     | 1  | 1     | 120           | 2<br><br>(left and right pons) | 300-420 | 1        | -            | -   | -                                                                                                                       | No significant adverse events reported<br><br><i>T≤6 hours</i>                                                                                                                                                          | - | No differences in coordination or grip strength between groups |
| <b>Aryal et al.</b><br>2017<br>[34]     | Rat                                                | Single-element, focused transducer<br><br>In-house                                           | Striatum                         | Intact | Definity® MBs            | 10 µL/kg                               | 0.69 | <b>0.55 or 0.81</b> | <b>0.66 or 0.98</b> | 10                     | 1  | 1     | 60            | 1                              | 300+    | 1        | -            | +   | <b>0.81MPa:</b> T2* cortical hypointense (petechiae) lesions detected in all animals<br><br><i>T=Immediately after</i>  | <b>0.55MPa:</b> DS=1<br><b>0.81MPa:</b> DS=2<br><br><i>T=1, 24, 48 and 72 hours</i>                                                                                                                                     | - | -                                                              |



|                                      |                                      |                                                            |                       |        |                                                                                           |                             |                 |                                                        |                             |     |       |      |     |                      |      |   |        |     |                                                                                                                 |                                                                                                                                                                                                                 |   |   |
|--------------------------------------|--------------------------------------|------------------------------------------------------------|-----------------------|--------|-------------------------------------------------------------------------------------------|-----------------------------|-----------------|--------------------------------------------------------|-----------------------------|-----|-------|------|-----|----------------------|------|---|--------|-----|-----------------------------------------------------------------------------------------------------------------|-----------------------------------------------------------------------------------------------------------------------------------------------------------------------------------------------------------------|---|---|
| <b>Aryal et al.</b><br>2015<br>[35]  | Rat<br><i>(9L gliosarcoma model)</i> | Single-element, focused transducer<br><br>In-house         | Striatal tumour site  | Intact | Definity® MBs                                                                             | 10 μL/kg                    | 0.69            | 0.55-0.81                                              | 0.66-0.98                   | 10  | 1     | 1    | 60  | 1                    | 300+ | 1 | -      | N/A | T2* hypointense (petechial) lesions detected<br><br><i>T= Immediately after</i>                                 | DS=0-1<br><br><i>T=4 hours</i>                                                                                                                                                                                  | - | - |
| <b>Aryal et al.</b><br>2015<br>[36]  | Rat<br><i>(9L Gliosarcoma model)</i> | Single-element, focused transducer<br><br>In-house         | Striatum              | Intact | Definity® MBs                                                                             | 10 μL/kg                    | 0.69            | <b>0.55</b> (sessions 1-2) and <b>0.81</b> (session 3) | <b>0.66</b> and <b>0.98</b> | 10  | 1     | 1    | 60  | 1                    | 300+ | 3 | Weekly | N/A | <b>US + Doxorubicin:</b> T2* cortical hypointense (petechial) lesions detected<br><br><i>T= 53 and 67 days</i>  | <b>US:</b> DS=0<br><br><b>US + Doxorubicin:</b> DS=1-3 (necrosis at worst); macrophage infiltration<br><br><i>Necrosis corresponded with cortical hypointense spots observed on MRI</i><br><br><i>T=70 days</i> | - | - |
| <b>Aslund et al.</b><br>2017<br>[37] | Rat                                  | Single-element, focused transducer<br><br>Imasonic™        | Striatum and thalamus | Intact | <b>Acoustic Cluster Therapy (ACT) MBs/micro droplet immersion</b> or <b>Sonazoid® MBs</b> | 1000 μL/kg                  | 1<br><i>(A)</i> | 0.28                                                   | 0.28                        | 0.4 | 0.004 | 1000 | 30  | 2<br><i>(A+B)</i>    | 0    | 1 | -      | ++  | No significant adverse events reported<br><br><i>T=5 minutes</i>                                                | <b>ACT MBs:</b> DS=1<br><br><i>T=40 minutes</i>                                                                                                                                                                 | - | - |
|                                      |                                      |                                                            |                       |        |                                                                                           |                             | 1<br><i>(B)</i> | 0.09                                                   | 0.09                        | 0.4 | 0.004 | 1000 | 600 |                      |      |   |        |     |                                                                                                                 |                                                                                                                                                                                                                 |   |   |
|                                      |                                      |                                                            |                       |        | Acoustic Cluster Therapy MB/micro droplet immersion                                       | 1000 μL/kg<br><i>(A)</i>    | 1<br><i>(A)</i> | 0.28                                                   | 0.28                        | 0.4 | 0.004 | 1000 | 30  | 1                    | -    | 1 | -      |     | No significant adverse events reported                                                                          | No significant adverse events reported                                                                                                                                                                          | - | - |
| <b>Cho et al.</b><br>2016<br>[38]    | Rat                                  | Single-element, focused transducer<br><br>FUS Instruments™ | Striatum              | Intact | Definity® MBs                                                                             | 20 μL/kg<br><i>Infusion</i> | 1               | 0.6-0.65                                               | 0.6-0.65                    | 10  | 1     | 1    | 120 | 1                    | -    | 1 | -      | N/A | No significant adverse events reported<br><br><i>T=Immediately after</i>                                        | DS=0-1<br><br><i>T=1 day</i>                                                                                                                                                                                    | - | - |
| <b>Chopra et al.</b><br>2010<br>[39] | Rat                                  | Single-element, focused transducer<br><br>In-house         | Subcortical           | Intact | Definity® MBs                                                                             | 10 μL/kg                    | 1.08            | <b>0.27-0.76</b>                                       | <b>0.26-0.52</b>            | 10  | 1     | 1    | 300 | 4                    | 300  | 1 | -      | ++  | <b>0.54 + 0.76MPa:</b> Irreversible T2 (haemorrhagic) lesions detected on MRI<br><br><i>T=Immediately after</i> | <b>0.27 MPa:</b> DS=0-1<br><b>0.39 MPa:</b> DS=0-3<br><b>0.59 MPa:</b> DS=0-3<br><b>0.78 MPa:</b> DS=2-3<br><br><i>T=2-4 hours</i>                                                                              |   |   |
|                                      |                                      |                                                            |                       |        |                                                                                           |                             | 1.08            | 0.2 – 0.6 W<br><i>(power ramp)</i>                     |                             | 10  | 1     | 1    | 300 | 4<br><br><i>NOLs</i> | 300  | 3 | Weekly | N/A | No significant adverse events reported                                                                          | DS=0 (2/4 rats)<br>DS=1-3 (2/4 rats)                                                                                                                                                                            | - | - |

|                               |     |                                                                  |                                                  |            |                                 |                                |     |                        |                        |             |    |     |     |   |   |   |   |      |                                                                                                                           |                                                                                                                                                   |   |   |
|-------------------------------|-----|------------------------------------------------------------------|--------------------------------------------------|------------|---------------------------------|--------------------------------|-----|------------------------|------------------------|-------------|----|-----|-----|---|---|---|---|------|---------------------------------------------------------------------------------------------------------------------------|---------------------------------------------------------------------------------------------------------------------------------------------------|---|---|
| Fan et al.<br>2016<br>[40]    | Rat | Single-element, focused transducer<br><br>Panametrics™           | Tumour site                                      | Intact     | In-house, SPIO-Dox loaded MBs   | 2.5 x 10 <sup>10</sup> MBs/mL  | 1   | 0.3 or 0.5             | 0.3 or 0.5             | 5000 cycles | 1  | N/A | 240 | 1 | 0 | 1 | - | ++   | -                                                                                                                         | 0.3MPa: DS=0<br>0.5MPa: DS=0                                                                                                                      | - | - |
| Fan et al.<br>2014<br>[41]    | Rat | Single-element, focused transducer<br><br>Panametrics™           | Striatum                                         | Craniotomy | In-house MBs                    | 1.5 x 10 <sup>7</sup> MBs/kg   | 1   | 0.3-1.5                | 0.3-1.5                | 1           | 10 | 1   | 60  | 1 | - | 1 | - | +++  | 1.5 MPa: Oedematous + haemorrhagic areas detected on MRI<br><br>T=2 hours                                                 | Histological findings not reported<br><br>T=6 hours                                                                                               | - | - |
|                               |     |                                                                  |                                                  |            | SonoVue® MBs                    | 1.5 x 10 <sup>7</sup> MBs/kg   | 1   | 0.2-1.5                | 0.2-1.5                | 1           | 10 | 1   | 60  | 1 | - | 1 | - | ++++ | 1.5 MPa: Oedematous + haemorrhagic areas detected on MRI                                                                  | 0.2-0.5 MPa: DS=1<br><br>1 MPa: DS= 1-2<br><br>1.5 MPa: DS=3; apoptotic cells detected                                                            | - | - |
|                               |     |                                                                  |                                                  |            | In-house MBs                    | 1.5 x 10 <sup>7</sup> MBs/kg   | 10  | 1.0-4.5                | 0.32-1.42              | 1           | 10 | 1   | 60  | 1 | - | 1 | - | +++  | No significant adverse events reported                                                                                    | 2-4.5 MPa: DS=1                                                                                                                                   | - | - |
|                               |     |                                                                  |                                                  |            | SonoVue® MBs                    | 1.5 x 10 <sup>7</sup> MBs/kg   | 10  | 2.0-4.5                | 0.63-1.42              | 1           | 10 | 1   | 60  | 1 | - | 1 | - | +    | No significant adverse events reported                                                                                    | Histological findings not reported                                                                                                                | - | - |
|                               |     |                                                                  |                                                  |            | In-house, carmustine loaded MBs | 9.89 x 10 <sup>9</sup> MBs/rat | 10  | 2.5 and 4.5            | 0.79-1.42              | 1           | 10 | 1   | 240 | 1 | - | 1 | - | +++  | No significant adverse events reported                                                                                    | No significant adverse events reported                                                                                                            | - | - |
| Fan et al.<br>2015<br>[42]    | Rat | Single-element, focused transducer                               | Striatum                                         | Intact     | In-house, carmustine loaded MBs | 0.5 x 10 <sup>9</sup> MBs/rat  | 1   | 0.3-1.5                | 0.3-1.5                | 1           | 10 | 1   | 240 | 1 | - | 1 | - | ++++ | -                                                                                                                         | 1 MPa: DS=1-2<br><br>1.5 MPa: DS=2<br><br>T=5 minutes                                                                                             | - | - |
|                               |     | 10 MHz single-element, focused transducer<br><br>Sonic Concepts™ |                                                  |            |                                 |                                | 10  | 1.49-4.49              | 0.47-1.42              | 1           | 10 | 1   | 240 | 1 | - | 1 | - | +++  | -                                                                                                                         | No significant adverse events reported                                                                                                            | - | - |
| Goutal et al.<br>2018<br>[43] | Rat | Single-element, focused transducer<br><br>Imasonic™              | Longitudinal area across cerebrum and cerebellum | Intact     | SonoVue® MBs                    | 200 µL/rat                     | 1.5 | 0.6                    | 0.49                   | 3           | 1  | 0.3 | 300 | 1 | - | 1 | - | N/A  | No significant adverse events reported<br><br>T=10 minutes                                                                | -                                                                                                                                                 | - | - |
| Han et al.<br>2021<br>[44]    | Rat | Single-element, focused transducer<br><br>FUS Instruments™       | Striatum and thalamus                            | Intact     | Definity® MBs<br><br>Infusion   | 20 µL/rat                      | 1.1 | 0.60-0.65 or 0.75-0.80 | 0.57-0.62 or 0.72-0.76 | 10          | 1  | 1   | 120 | 1 | - | 1 | - | +    | 0.65 MPa: Increased water movement on ADC<br><br>0.80 MPa: Increased and prolonged (up to 48 hours) water movement on ADC | 0.65 MPa: DS 0<br><br>0.80 MPa: DS=2; prolonged and increased aquaporin-4 expression; neurodegeneration present<br><br>T = 5 min, 24 and 48 hours | - | - |

|                                              |     |                                                            |                              |        |                                     |           |                 |                 |                  |    |   |   |     |                      |                |                                   |               |     |                                                                                                                                                                          |                                                                                                                                                                                                                          |                                                                                                                                                                                                                                                              |   |
|----------------------------------------------|-----|------------------------------------------------------------|------------------------------|--------|-------------------------------------|-----------|-----------------|-----------------|------------------|----|---|---|-----|----------------------|----------------|-----------------------------------|---------------|-----|--------------------------------------------------------------------------------------------------------------------------------------------------------------------------|--------------------------------------------------------------------------------------------------------------------------------------------------------------------------------------------------------------------------|--------------------------------------------------------------------------------------------------------------------------------------------------------------------------------------------------------------------------------------------------------------|---|
|                                              |     |                                                            |                              |        |                                     |           |                 |                 |                  |    |   |   |     |                      |                |                                   |               |     | <i>T= 5 minutes, 24 and 48 hours</i>                                                                                                                                     |                                                                                                                                                                                                                          |                                                                                                                                                                                                                                                              |   |
| <b>Huh et al.</b><br><br>2020<br><br>[45]    | Rat | Single-element, focused transducer<br><br>FUS Instruments™ | <b>Striatum and thalamus</b> | Intact | Definity® MBs                       | 10 μL/kg  | 1.13            | 0.65            | 0.61             | 10 | 1 | 1 | 120 | 2<br><br><i>NOLs</i> | 300            | 1                                 | -             | +   | -                                                                                                                                                                        | <b>Striatal targets:</b> DS=1<br><b>Thalamic targets:</b> DS=2                                                                                                                                                           | -                                                                                                                                                                                                                                                            | - |
| <b>Jung et al.</b><br><br>2019<br><br>[46]   | Rat | Single-element, focused transducer<br><br>FUS Instruments™ | Striatum and thalamus        | Intact | Definity® MBs                       | 20 μL/kg  | 1<br><i>(B)</i> | 0.6-0.72        | 0.6-0.72         | 10 | 1 | 1 | 120 | 2<br><br><i>NOLs</i> | Simultaneously | 1                                 | -             | +   | No significant adverse events reported<br><br><i>T=12 minutes</i>                                                                                                        | No significant adverse events reported<br><br><i>T=24 hours</i>                                                                                                                                                          | -                                                                                                                                                                                                                                                            | - |
|                                              |     |                                                            |                              |        |                                     | No MBs    | 1<br><i>(F)</i> | <b>0.5-2</b>    | <b>0.5-2</b>     | 10 | 1 | 1 | 120 | 2<br><br><i>NOLs</i> | Simultaneously | 2<br><i>(F + B)</i>               | Not specified | +++ | <b>1 and 2MPa:</b> Δ <i>T</i> = ±1°C compared to unsonicated regions                                                                                                     | <b>2 MPa:</b> DS=2 (mild neuropil vacuolation)                                                                                                                                                                           | -                                                                                                                                                                                                                                                            | - |
|                                              |     |                                                            |                              |        |                                     | 20 μL/kg  | 1<br><i>(B)</i> | 0.6-0.72        | 0.6-0.72         | 10 | 1 | 1 | 120 | 2<br><br><i>NOLs</i> | Simultaneously | 2<br><b><i>(F + B or B+F)</i></b> | Not specified | ++  | No significant adverse events reported                                                                                                                                   | <b>B+F:</b> DS=3 (extensive neuropil vacuolation)                                                                                                                                                                        | -                                                                                                                                                                                                                                                            | - |
|                                              |     |                                                            |                              |        |                                     | No MBs    | 1<br><i>(F)</i> | 1               | 1                | 10 | 1 | 1 | 120 |                      |                |                                   |               |     |                                                                                                                                                                          |                                                                                                                                                                                                                          |                                                                                                                                                                                                                                                              |   |
|                                              |     |                                                            |                              |        |                                     | 20 μL/kg  | 1<br><i>(B)</i> | 0.6-0.72        | 0.6-0.72         | 10 | 1 | 1 | 120 |                      |                |                                   |               |     |                                                                                                                                                                          |                                                                                                                                                                                                                          |                                                                                                                                                                                                                                                              |   |
| <b>Kobus et al.</b><br><br>2016<br><br>[47]  | Rat | Single-element, focused transducer<br><br>In-house         | Striatum                     | Intact | Definity® MBs                       | 10 μL/kg  | 0.69            | <b>0.66-0.8</b> | <b>0.79-0.96</b> | 10 | 1 | 1 | 60  | 3<br><br><i>OLs</i>  | 120+           | 6                                 | Weekly        | ++  | Permanent abnormalities (e.g. hypointense/hyperintense spots, enlarged ventricles) detected, via T2 W MRI, in 12/15 rats<br><br><i>T= Immediately after each session</i> | <b>DS=0-3</b> (necrosis)<br><br>Macrophage infiltration (14/15); hemosiderin deposits (11/15); iron/calcium mineralisation (5/15); cyst formation (4/15); astrogliosis/gliar scarring (10/15)<br><br><i>T=1-36 hours</i> | -                                                                                                                                                                                                                                                            | - |
| <b>Kovacs et al.</b><br><br>2017<br><br>[48] | Rat | Single-element, focused transducer<br><br>FUS Instruments™ | Frontal cortex               | Intact | Optison® MBs<br><br><i>Infusion</i> | 100 μL/kg | 0.59            | 0.3             | 0.39             | 10 | 1 | 1 | 120 | 1                    | -              | 1                                 | -             | N/A | Hypointense T2* voxels, indicating labelled macrophage extravasation<br><br><i>T=6 days</i>                                                                              | DS=0; some apoptotic cells; evidence of neuronal loss + astrogliosis<br><br>CD68+ macrophage activation and infiltration<br><br><i>T=1,6, and 24 hours</i>                                                               | Increased transcription of chemokines, cytokines and tropic factors associated with sterile inflammation and NF-kB pathway.<br><br>Increased protein expression of proinflammatory cytokines and heat-shock proteins<br><br><i>=0.5,1,6,12, and 24 hours</i> | - |

|                                              |                                                        |                                                            |                                             |            |                                                                                     |                                      |       |                                                                                     |                  |                  |         |             |                |                      |      |               |        |     |                                                                                                                                                                                                                                                    |                                                                                                                                                                                                                                                                                                                 |                                                                           |   |
|----------------------------------------------|--------------------------------------------------------|------------------------------------------------------------|---------------------------------------------|------------|-------------------------------------------------------------------------------------|--------------------------------------|-------|-------------------------------------------------------------------------------------|------------------|------------------|---------|-------------|----------------|----------------------|------|---------------|--------|-----|----------------------------------------------------------------------------------------------------------------------------------------------------------------------------------------------------------------------------------------------------|-----------------------------------------------------------------------------------------------------------------------------------------------------------------------------------------------------------------------------------------------------------------------------------------------------------------|---------------------------------------------------------------------------|---|
| <b>Kovacs et al.</b><br><br>2018<br><br>[49] | Rat                                                    | Single-element, focused transducer<br><br>FUS Instruments™ | Frontal cortex/striatum and hippocampus     | Intact     | Optison® MBs<br><br><i>Infusion</i><br><br><i>1 dose given for both sonications</i> | 100 µL/kg                            | 0.55  | 0.3<br><br><i>(first 2 sessions)</i><br><br>0.5<br><br><i>(subsequent sessions)</i> | 0.40<br>0.67     | 10               | 0.5-0.6 | 0.5-0.6     | 120            | 2<br><br><i>NOLS</i> | 300+ | <b>1 or 6</b> | Weekly | +   | <b>1 US session:</b> few hypointense T2* lesions (microhaemorrhage)<br><br><b>6 US sessions:</b> multiple hyperintense T2 lesions (astrogliosis) + enlarged ventricles; hypointense T2* lesions (microhaemorrhages)<br><br><i>T=7 and 13 weeks</i> | <b>1 US session:</b> DS=1; astrogliosis; iron deposition; slight CD68+ macrophage activation and infiltration; mild neurogenesis<br><br><b>6 US sessions:</b> DS=1; astrogliosis; iron deposition; extensive CD68+ macrophage activation and infiltration; moderate neurogenesis<br><br><i>T=7 and 13 weeks</i> | <b>6 US sessions:</b> hyperphosphorylated tau in frontal lobe sonications | - |
| <b>Liu et al.</b><br><br>2009<br><br>[50]    | Rat                                                    | Single-element, focused transducer<br><br>Imasonic™        | Frontal lobe                                | Intact     | None                                                                                | -                                    | 1.5   | <b>1.1-3.5</b>                                                                      | <b>0.90-2.86</b> | 10               | 1       | 1           | 30             | 1                    | -    | 1             | -      | ++  | <b>1.1MPa:</b> No T2* hypointensities (haemorrhagic lesions)<br><br><b>1.9-3.5MPa:</b> Increasing area T2* hyperintensities (haemorrhagic lesions)<br><br><i>T=21 and 48 minutes</i>                                                               | <b>1.1MPa:</b> DS=0-1<br><br><b>1.9-3.5MPa:</b> Worsening haemorrhagic change<br><br><i>T=1 hour</i>                                                                                                                                                                                                            | -                                                                         | - |
| <b>Liu et al.</b><br><br>2010<br><br>[51]    | Rat<br><br><i>(Healthy and C6 Glioblastoma Models)</i> | Single-element, focused transducer<br><br>Imasonic™        | Frontal lobe and striatum                   | Intact     | SonoVue® MBs                                                                        | 2.5 µg/kg<br><br><i>Healthy Rats</i> | 0.4   | <b>0.45-1.35</b>                                                                    | <b>0.71-2.13</b> | 10               | 1       | 1           | 30             | 1                    | -    | 1             | -      | +++ | <b>≥0.98 MPa:</b> Large, hypointense T2* lesions (intracerebral haemorrhaging)<br><br><i>T= &lt;30 minutes</i>                                                                                                                                     | No significant adverse events reported<br><br><i>T=4 hours</i>                                                                                                                                                                                                                                                  | -                                                                         | - |
|                                              |                                                        |                                                            |                                             |            |                                                                                     | 2.5 µg/kg<br><br><i>C6 Rats</i>      | 0.4   | 0.62                                                                                | 0.98             | 10               | 1       | 1           | 30             | 1                    | -    | 1             | -      | N/A | No significant adverse events reported                                                                                                                                                                                                             | <b>DS=2</b> (areas of gliosis, infiltrating inflammatory cells)                                                                                                                                                                                                                                                 | -                                                                         | - |
| <b>Liu et al.</b><br><br>2010<br><br>[52]    | Rat                                                    | Single-element, unfocused transducer<br><br>K-Sonic Inc.™  | Cerebrum<br><br><i>Fixed application</i>    | Intact     | SonoVue® MBs                                                                        | 25 µL/kg                             | 0.028 | 0.8                                                                                 | 4.78             | 10               | 1       | 1           | <b>240-600</b> | 1                    | -    | 1             | -      | +++ | -                                                                                                                                                                                                                                                  | <b>SD=240s:</b> DS=0<br><b>SD=360s:</b> DS=0-1<br><b>SD=480s:</b> DS=1<br><b>SD=600s:</b> DS=2 (mild necrosis)                                                                                                                                                                                                  | -                                                                         | - |
|                                              |                                                        |                                                            |                                             |            |                                                                                     | 25 µL/kg                             | 0.028 | 0.8                                                                                 | 4.78             | <b>10-100</b>    | 1       | <b>1-10</b> | 360            | 1                    | -    | 1             | -      | ++  | -                                                                                                                                                                                                                                                  | <b>50ms:</b> DS=1<br><b>100ms:</b> DS=2<br><br><i>T=4-6 hours</i>                                                                                                                                                                                                                                               | -                                                                         | - |
|                                              |                                                        |                                                            | Cerebrum<br><br><i>Scanning application</i> | Intact     |                                                                                     | 25 µL/kg                             | 0.028 | 0.8                                                                                 | 4.78             | <b>50 or 100</b> | 1       | <b>5-10</b> | 360            | 1                    | -    | 1             | -      | +++ | -                                                                                                                                                                                                                                                  | <b>100ms:</b> DS=1                                                                                                                                                                                                                                                                                              | -                                                                         | - |
| <b>Liu et al.</b><br><br>2008                | Rat                                                    | Single-element, focused transducer                         | Frontal lobe                                | Craniotomy | SonoVue® MBs                                                                        | 25 µL/kg                             | 1.5   | <b>0.55-4.9</b>                                                                     | <b>0.45-4.0</b>  | 10               | 1       | <b>1</b>    | 30             | 1                    | -    | 1             | -      | +++ | <b>≥1.9 MPa:</b> SWI hypointensities (haemorrhagic)                                                                                                                                                                                                | <b>0.55 MPa:</b> DS=0<br><b>0.78 MPa:</b> DS=0-1<br><b>1.1 MPa:</b> DS=0-1<br><b>1.9 MPa:</b> DS=0-2                                                                                                                                                                                                            | -                                                                         | - |

|                                  |     |                                                                                                    |                    |            |                                                       |                                            |      |             |           |    |     |      |                                                                     |               |                                                               |   |         |     |                                                                                                                                                                |                                                                                                                                                                                                                    |   |   |
|----------------------------------|-----|----------------------------------------------------------------------------------------------------|--------------------|------------|-------------------------------------------------------|--------------------------------------------|------|-------------|-----------|----|-----|------|---------------------------------------------------------------------|---------------|---------------------------------------------------------------|---|---------|-----|----------------------------------------------------------------------------------------------------------------------------------------------------------------|--------------------------------------------------------------------------------------------------------------------------------------------------------------------------------------------------------------------|---|---|
| [53]                             |     | Imasonic™                                                                                          |                    |            |                                                       |                                            |      |             |           |    |     |      |                                                                     |               |                                                               |   |         |     | 4.9MPa: extensive haemorrhaging<br><br><i>T=1 and 8 days</i>                                                                                                   | 2.45 MPa: DS=0-2; apoptotic cells detected<br><br>3.47 MPa: DS=0-2; apoptotic cells detected<br><br>4.9 MPa: DS=0-3 (extensive neuropil vacuolation, necrosis); apoptotic cells detected<br><br><i>T=4-6 hours</i> |   |   |
| Liu et al.<br>2010<br>[54]       | Rat | Single-element, focused transducer<br><br>Imasonic™                                                | Frontal lobe       | Craniotomy | SonoVue® MBs                                          | 25 µL/kg<br><br>(1 dose per 3 sonications) | 1.5  | 1.10        | 0.90      | 10 | 1   | 1    | 30                                                                  | 6<br><br>OLs  | <5<br><br>(300+ between 3 <sup>rd</sup> and 4 <sup>th</sup> ) | 1 | -       | ++  | No significant adverse events reported<br><br><i>T=10 minutes and continuously until 3 hours; 4 and 24 hours</i>                                               | DS= 0-1; no macrophage infiltration                                                                                                                                                                                | - | - |
|                                  |     |                                                                                                    |                    |            |                                                       | 25 µL/kg                                   | 1.5  | 2.45        | 2.00      | 10 | 1   | 1    | 30                                                                  | 1             | -                                                             | 1 | -       |     | T2* hypointense (haemorrhagic) lesion detected; macrophage infiltration detected via SPIOs                                                                     | DS= 2-3; macrophage infiltration observed                                                                                                                                                                          | - | - |
| Marty et al.<br>2012<br>[55]     | Rat | Single-element, focused transducer<br><br>Imasonic™                                                | Thalamus           | Intact     | SonoVue® MBs                                          | 200 µL/rat                                 | 1.5  | 0.45        | 0.37      | 3  | 10  | 3    | 60                                                                  | 1             | -                                                             | 1 | -       | N/A | No significant adverse events reported                                                                                                                         | -                                                                                                                                                                                                                  | - | - |
| McDannold et al.<br>2019<br>[56] | Rat | ExAblate Neuro® low frequency, 1024 element phase array, focused transducer<br><br>InSightec™ Ltd. | Cerebral locations | Intact     | Definity® MBs                                         | 10 µL/kg                                   | 0.23 | 0.12-0.19   | 0.25-0.40 | 5  | 1.1 | 0.55 | 30 (1 <sup>st</sup> )<br><br>75 (2 <sup>nd</sup> )                  | 2<br><br>OLs  | 120+                                                          | 3 | 3 weeks | N/A | No significant adverse events reported<br><br><i>T=48 or 72 hours</i>                                                                                          | Small scar (<1mm) in one rat<br><br><i>T=3 weeks</i>                                                                                                                                                               | - | - |
| McDannold et al.<br>2020<br>[57] | Rat | ExAblate Neuro® low frequency, 1024 element phase array, focused transducer<br><br>InSightec™ Ltd. | Cerebral locations | Intact     | Definity® MBs<br><br>(No MBs for first 4 sonications) | 10 µL/kg                                   | 0.23 | 0.068-0.165 | 0.14-0.34 | 5  | 1.1 | 0.55 | 30 (First 4)<br><br>55 (Applied twice - first 4 no MBs; last 4 MBs) | 4<br><br>OLs  | 120+                                                          | 3 | 3 weeks | N/A | Hyperintense T2 (oedema) lesions detected in striatum/cortex in half of all sessions; lesion; did not resolve by day 7 in 3 rats<br><br><i>T= 1 and 7 days</i> | DS=1; additional pale stained scars found in the striatum of 4 rats (3 of which had the unresolved oedema)<br><br><i>T=2 days</i>                                                                                  |   |   |
| McDannold et al.<br>2011<br>[58] | Rat | Single element, piston, unfocused transducer<br><br>In-house                                       | Putamen + thalamus | Intact     | Definity® MBs                                         | 10 µL/kg                                   | 0.53 | 0.13-0.31   | 0.18-0.43 | 10 | 1   | 1    | 60                                                                  | 4<br><br>NOLs | 300+                                                          | 1 | -       | ++  | No significant adverse events reported<br><br><i>T=4 hours</i>                                                                                                 | 0.24-0.31MPa: DS=2 (mild parenchymal damage)<br><br><i>T=4 hours</i>                                                                                                                                               | - | - |

|                                 |     |                                                            |                     |        |                                                                                       |                                                      |       |                                 |              |    |     |     |     |                                              |      |   |   |                                                                             |                                                                                                                                                                          |                                                                                                                                                                                                                                    |                                                                                                                      |   |
|---------------------------------|-----|------------------------------------------------------------|---------------------|--------|---------------------------------------------------------------------------------------|------------------------------------------------------|-------|---------------------------------|--------------|----|-----|-----|-----|----------------------------------------------|------|---|---|-----------------------------------------------------------------------------|--------------------------------------------------------------------------------------------------------------------------------------------------------------------------|------------------------------------------------------------------------------------------------------------------------------------------------------------------------------------------------------------------------------------|----------------------------------------------------------------------------------------------------------------------|---|
| Mcmahon et al.<br>2017<br>[59]  | Rat | Single-element, focused transducer<br><br>FUS Instruments™ | Striatum + thalamus | Intact | Definity® MBs<br><br>Infusion                                                         | 10 or 100 µL/kg                                      | 0.55  | 0.19-0.20                       | 0.26-0.27    | 10 | 1   | 1   | 120 | 3<br><br>NOLs                                | 900+ | 1 | - | ++                                                                          | No significant adverse events reported<br><br>T=4 hours                                                                                                                  | No significant adverse events reported<br><br>T=6 hours                                                                                                                                                                            | 10 µL/kg MB: no changes<br><br>100 µL/kg MB: increased expression of genes associated with NF-kB pathway             | - |
|                                 |     |                                                            |                     |        |                                                                                       | 100 µL/kg                                            | 0.55  | 0.20 or 0.29                    | 0.27 or 0.39 | 10 | 1   | 1   | 120 | 3<br><br>NOLs                                | 900+ | 1 | - | +                                                                           | 0.20 + 0.29MPa: Transient hypertensive T2* (oedema) lesions; transient hypointense (microhemorrhage) T2 lesion detected via T2 MRI in one animal<br>T=4 hours and 4 days | 0.20MPa: DS=1-2 (leukocyte infiltration + evidence of some neuronal degeneration)<br><br>0.29MPa: DS=1-2 (leukocyte infiltration + evidence of some neuronal degeneration+ few microglial nodules + few necrotic foci)<br>T=4 days | 0.20 + 0.29MPa: increase expression of genes associated with NF-kB pathway                                           | - |
| Mcmahon et al.<br>2020<br>[60]  | Rat | Single-element, focused transducer<br><br>FUS Instruments™ | Striatum + thalamus | Intact | Definity® MBs<br><br>BG8774 (In-house MBs)<br><br>MSB4 (In-house MBs)<br><br>Infusion | Gas volume equivalent to 20 µL/kg of Definity® given | 0.58  | 0.25-0.45                       | 0.33 – 0.59  | 10 | 0.5 | 0.5 | 260 | 1                                            | -    | 1 | - | +                                                                           | -                                                                                                                                                                        | All MBs: DS=1 @ 1-day post sonication; DS=0 @ 7-days post sonication<br>T=1 and 7 days                                                                                                                                             | MSB4: Significantly increased transcription of proinflammatory genes: Il1b, Ccl2 and Tnf                             | - |
| Mcmahon et al.<br>2020<br>[61]  | Rat | Single-element, focused transducer<br><br>FUS Instruments™ | Dorsal hippocampus  | Intact | Definity® MBs<br><br>Infusion                                                         | 20 µL/kg                                             | 0.58  | 0.36-0.39 (triggering pressure) | 0.47-0.51    | 10 | 1   | 1   | 120 | 3<br><br>NOLs                                | 300+ | 1 | - | +                                                                           | Dexamethasone appeared to reduce BBBB and reversed BBBB quicker<br>T=15 minutes and 2 hours                                                                              | Saline: Evidence of astrogliosis + increased vascular density<br><br>Dexamethasone: No significant adverse events<br>T=10 days                                                                                                     | Saline: Increased GFAP, ICAM1, MCP1, VEGF expression<br><br>Dexamethasone: No significant adverse events<br>T=2 days | - |
| O'Reilly et al.<br>2017<br>[62] | Rat | Single-element, focused transducer<br><br>In-house         | Subcortical targets | Intact | Definity® MBs<br><br>Infusion                                                         | 20 µL/kg                                             | 0.552 | 0.28                            | 0.34         | 10 | 1   | 1   | 120 | 1<br><br>(Single vs multi-point sonications) | 300+ | 1 | - | 0<br>No difference observed between single point or multi-point sonications | No significant adverse events reported<br>T=6 and 24 (T2 only) hours                                                                                                     | Small foci of tissue injury on H/E in 1/5 rats<br>T=48 hours                                                                                                                                                                       | -                                                                                                                    | - |

|                                 |                                           |                                                                                       |                                   |        |                                      |                             |      |          |      |       |                                              |       |     |                        |        |                                     |   |    |                                                                                                                                                                                                                        |                                                                |   |   |
|---------------------------------|-------------------------------------------|---------------------------------------------------------------------------------------|-----------------------------------|--------|--------------------------------------|-----------------------------|------|----------|------|-------|----------------------------------------------|-------|-----|------------------------|--------|-------------------------------------|---|----|------------------------------------------------------------------------------------------------------------------------------------------------------------------------------------------------------------------------|----------------------------------------------------------------|---|---|
| O'Reilly et al.<br>2011<br>[63] | Rat                                       | Single-element, focused transducer arranged as a hemispherical array<br><br>Imasonic™ | Midline, subcortical targets      | Intact | Definity® MBs                        | 20 µL/kg<br><b>Bolus</b>    | 1.18 | 0.54     | 0.50 | 0.003 | 3,333 – 166,667                              | 1- 50 | 120 | 8<br><i>NOLs</i>       | 300    | 1                                   | - | +  | <b>6µs:</b> 17/40 sonications w/ possible oedema<br><b>60µs:</b> 2/10 sonications w/ possible oedema<br><br><b>300µs:</b> 4/10 sonications w/ possible oedema<br><br><b>300µs:</b> 3/10 sonications w/ possible oedema | Correlative with MRI findings<br><br><i>T=2 hour</i>           | - | - |
|                                 |                                           |                                                                                       |                                   |        |                                      | 20 µL/kg<br><b>Infusion</b> | 1.18 | 0.54     | 0.50 | 0.003 | 166,667                                      | 50    | 300 | 8<br><i>NOLs</i>       | 300    | 1                                   | - | +  | <b>Bolus:</b> 28/32 sonications w/ possible oedema<br><br><b>Infusion:</b> 5/32 sonications w/ possible oedema                                                                                                         | <i>Histological findings not clearly reported</i>              | - | - |
|                                 |                                           |                                                                                       |                                   |        |                                      | 20 µL/kg<br><b>Infusion</b> | 1.18 | 0.54     | 0.50 | 0.003 | 166,667<br><i>Burst repetition frequency</i> | 50    | 300 | 8<br><i>NOLs</i>       | 300    | 1                                   | - | +  | No significant adverse events reported                                                                                                                                                                                 | <i>Histological findings not clearly reported</i>              | - | - |
| Park et al.<br>2017<br>[64]     | Rat<br>(Healthy and 9L gliosarcoma model) | Single-element, focused transducer<br><br>In-house                                    | Cerebral locations or tumour Site | Intact | Definity® MBs<br><i>Healthy Rats</i> | 10 µL/kg                    | 0.69 | 0.72     | 0.87 | 10    | 1                                            | 1     | 60  | <b>6</b><br><i>OLs</i> | 120+   | 1                                   | - | ++ | No significant adverse events reported                                                                                                                                                                                 | No significant adverse events reported<br><br><i>T=4 hours</i> | - | - |
|                                 |                                           |                                                                                       |                                   |        | Definity® MBs<br><i>9L Rats</i>      | 10 µL/kg                    | 0.69 | 0.72     | 0.87 | 10    | 1                                            | 1     | 60  | <b>5</b><br><i>OLs</i> | 120+   | 2<br><i>(Bilateral sonications)</i> | - |    |                                                                                                                                                                                                                        |                                                                |   |   |
| Park et al.<br>2012<br>[65]     | Rat                                       | Single-element, focused transducer<br><br>In-house                                    | Striatum and hippocampus          | Intact | Definity® MBs                        | 10 µL/kg                    | 0.69 | 0.6-0.72 |      | 10    | 1                                            | 1     | 60  | 2<br><i>NOLs</i>       | 120s + | <b>1</b>                            | - | +  | Transient, hypointense T2 (microhemorrhage) lesion detected in one animal<br><br><i>T=serially imaged for 7.5 hours</i>                                                                                                | DS=0-1<br><br><i>T=4 hours</i>                                 | - | - |

|                                         |     |                                                                                                                          |                                                                              |                                                           |                                             |                                                    |                  |                     |                    |       |     |        |            |                      |             |                  |                      |           |                                                                                                                                                                              |                                                                                            |                                                                    |                                                                                    |
|-----------------------------------------|-----|--------------------------------------------------------------------------------------------------------------------------|------------------------------------------------------------------------------|-----------------------------------------------------------|---------------------------------------------|----------------------------------------------------|------------------|---------------------|--------------------|-------|-----|--------|------------|----------------------|-------------|------------------|----------------------|-----------|------------------------------------------------------------------------------------------------------------------------------------------------------------------------------|--------------------------------------------------------------------------------------------|--------------------------------------------------------------------|------------------------------------------------------------------------------------|
|                                         |     |                                                                                                                          |                                                                              |                                                           |                                             | 10<br>μL/kg                                        | 0.69             | 0.68<br>and<br>0.72 |                    | 10    | 1   | 1      | 60         | 2<br><br><i>NOLs</i> | 120s +      | 2                | 10<br>or<br>120 mins | +         | No significant adverse<br>events reported                                                                                                                                    | 10-min intersession<br>duration: DS=0-1<br><br>120-min intersession<br>duration: DS=0-1    | -                                                                  | -                                                                                  |
| Shin et<br>al.<br><br>2018<br><br>[66]  | Rat | Single-element,<br>focused<br>transducer<br><br>Sonic<br>Concepts™ Inc.                                                  | Cerebrum                                                                     | Intact                                                    | Definity®<br>MBs                            | 20<br>or<br>100<br>μL/kg                           | 0.52             | 0.3                 |                    | 10    | 1   | 1      | 60         | 1                    | -           | 1                | -                    | ++        | -                                                                                                                                                                            | 100 μL/kg; DS=1<br><br><i>T=4 hours</i>                                                    | -                                                                  | -                                                                                  |
|                                         |     |                                                                                                                          |                                                                              |                                                           | SonoVue®<br>MBs                             | 30<br>μL/kg                                        | 0.52             | 0.3                 | 0.42               | 10    | 1   | 1      | 60         | 1                    | -           | 1                | -                    | +         | -                                                                                                                                                                            | DS=1                                                                                       | -                                                                  | -                                                                                  |
|                                         |     |                                                                                                                          |                                                                              |                                                           | Definity®<br>MBs                            | 20<br>μL/kg                                        | 0.52             | 0.2-1.5             | 0.28-<br>2.08      | 10    | 1   | 1      | 60         | 1                    | -           | 1                | -                    | + - + + + | -                                                                                                                                                                            | 0.6 MPa: DS=2<br>1.5 MPa: DS=3<br>(significant parenchymal<br>damage)                      | -                                                                  | -                                                                                  |
|                                         |     |                                                                                                                          |                                                                              |                                                           |                                             | 20<br>μL/kg                                        | 1.6              | 0.3<br>or<br>0.6    | 0.24<br>or<br>0.47 | 10    | 1   | 1      | 60         | 1                    | -           | 1                | -                    | +         | -                                                                                                                                                                            | DS=1                                                                                       | -                                                                  | -                                                                                  |
|                                         |     |                                                                                                                          |                                                                              |                                                           |                                             | 20<br>μL/kg                                        | 0.52             | 0.3                 | 0.42               | 1-100 | 1   | 0.1-10 | 60         | 1                    | -           | 1                | -                    | + - + +   | -                                                                                                                                                                            | 100ms: DS=3<br>(parenchymal damage)                                                        | -                                                                  | -                                                                                  |
|                                         |     |                                                                                                                          |                                                                              |                                                           |                                             | 20<br>μL/kg                                        | 0.52             | 0.3                 | 0.42               | 10    | 1-5 | 1-5    | 60         | 1                    | -           | 1                | -                    | + - + +   | -                                                                                                                                                                            | No significant adverse<br>events reported                                                  | -                                                                  | -                                                                                  |
|                                         |     |                                                                                                                          |                                                                              |                                                           |                                             | 20<br>μL/kg                                        | 0.52             | 0.3                 | 0.42               | 10    | 1   | 1      | 30-<br>300 | 1                    | -           | 1                | -                    | + - + +   | -                                                                                                                                                                            | 120s: DS=1<br>300s: DS=2                                                                   | -                                                                  | -                                                                                  |
| Song et<br>al.<br><br>2017<br><br>[67]  | Rat | Therapeutic<br>Imaging Probe<br>System (TIPS),<br>multi-element<br>phase array,<br>focused<br>transducer<br><br>Philips™ | Striatum                                                                     | Intact (skin<br>incision made<br>over sagittal<br>suture) | Size<br>isolated,<br>2μm<br>diameter<br>MBs | 4x10 <sup>8</sup> -<br>4x10 <sup>9</sup><br>MBs/kg | 1                | 0.5                 | 0.5                | 1     | 100 | 10     | 300        | 2<br><br><i>NOLs</i> | Unkno<br>wn | 1                | -                    | +         | No significant adverse<br>events reported<br><br><i>T=immediately after</i>                                                                                                  | -                                                                                          | -                                                                  | -                                                                                  |
|                                         |     |                                                                                                                          |                                                                              |                                                           | Size<br>isolated,<br>6μm<br>diameter<br>MBs | 4x10 <sup>7</sup> -<br>4x10 <sup>8</sup><br>MBs/kg | 1                | 0.5                 | 0.5                | 1     | 100 | 10     | 300        | 2<br><br><i>NOLs</i> | Unkno<br>wn | 1                | -                    | ++        | 2 x 10 <sup>8</sup> MBs/kg:<br>micro-haemorrhages<br>visible<br>macroscopically<br><br>4 x 10 <sup>8</sup> MBs/kg: large<br>haemorrhagic areas<br>visible<br>macroscopically | -                                                                                          | -                                                                  | -                                                                                  |
| Treat et<br>al.<br><br>2007<br><br>[68] | Rat | Single-element,<br>focused<br>transducer<br><br>In-house                                                                 | Striatum +<br>thalamus/hi<br>ppocampus<br>(2 locations<br>per<br>hemisphere) | Intact                                                    | Optison®<br>MBs                             | 100<br>μL/kg                                       | 1.5<br>or<br>1.7 | 0.5-1.6             | 0.38-<br>1.31      | 10    | 1   | 1      | 30         | 1                    | -           | 1                | -                    | +         | No significant adverse<br>events reported<br><br><i>T=4 hours</i>                                                                                                            | 1.1MPa: DS=1<br>(hyperchromatic neurons)<br><br><i>T=4 hours</i>                           | -                                                                  | -                                                                                  |
|                                         |     |                                                                                                                          |                                                                              |                                                           |                                             | 100 -<br>500<br>μL/kg                              | 1.5<br>or<br>1.7 | 1.1                 | 0.84 or<br>0.90    | 10    | 1   | 1      | 120        | 5<br><br><i>OL</i>   | 240-<br>300 | 1                | -                    | +         | 200 and 500μL/kg:<br>macroscopic lesion<br>(tissue damage)<br>observed                                                                                                       | 100μL/kg: DS=1-2<br>200μL/kg: DS=2-3<br>500μL/kg: DS=3                                     | -                                                                  | -                                                                                  |
| Tsai et<br>al.<br><br>2018              | Rat | Single-element,<br>focused<br>transducer<br><br>Imasonic™                                                                | Basal<br>ganglia                                                             | Intact                                                    | SonoVue®<br>MBs                             | 150<br>μL/kg                                       | 0.4              | 0.30-<br>0.89       | 0.47-<br>1.40      | 10    | 1   | 1      | 120        | 1                    | -           | 2<br><br>or<br>3 | 48hrs                | ++        | -                                                                                                                                                                            | 0.51MPa: DS=1-2 (mild<br>parenchymal damage +<br>macrophage infiltration);<br>astrogliosis | 0.89 MPa: elevation in<br>plasma fibrinogen<br><br><i>T=8 days</i> | 0.89 MPa: transient<br>hypoactivity, ataxia<br>and tremor observed in<br>2/10 rats |



|                                    |                                               |                                                                                                                     |                 |        |                                                       |                                          |            |                                                    |                     |              |            |            |              |                             |               |              |                    |               |                                                                                                                                                                                                                                                          |                                                                                                                                                                                                           |                                            |                     |
|------------------------------------|-----------------------------------------------|---------------------------------------------------------------------------------------------------------------------|-----------------|--------|-------------------------------------------------------|------------------------------------------|------------|----------------------------------------------------|---------------------|--------------|------------|------------|--------------|-----------------------------|---------------|--------------|--------------------|---------------|----------------------------------------------------------------------------------------------------------------------------------------------------------------------------------------------------------------------------------------------------------|-----------------------------------------------------------------------------------------------------------------------------------------------------------------------------------------------------------|--------------------------------------------|---------------------|
| [69]                               |                                               |                                                                                                                     |                 |        |                                                       |                                          |            |                                                    |                     |              |            |            |              |                             |               |              |                    |               | <b>0.89MPa:</b> DS=3 (tissue necrosis + macrophage infiltration); astrogliosis<br><br><i>T= 5 days</i>                                                                                                                                                   |                                                                                                                                                                                                           | No other reported adverse behaviour events |                     |
|                                    |                                               |                                                                                                                     |                 |        |                                                       | <b>400 μL/kg</b>                         | 0.4        | <b>0.21 or 0.51</b>                                | <b>0.33 or 0.80</b> | 10           | 1          | 1          | 120          | 1                           | -             | <b>1-3</b>   | <b>0 or 48 hrs</b> | ++            | -                                                                                                                                                                                                                                                        | <b>0.21MPa:</b> DS=0; apoptotic cells; astrogliosis<br><br><b>0.51MPa:</b> DS=3; apoptotic cells; astrogliosis<br><br>Number of apoptotic cells <b>increased with US sessions</b><br><br><i>T=2 hours</i> | -                                          | -                   |
| <b>Wei et al.</b><br>2013<br>[70]  | Rat<br><i>(Health y and 9L glioma models)</i> | Single-element, focused transducer<br><br>Imasonic™                                                                 | Striatum        | Intact | SonoVue® MBs                                          | 100 μL/kg                                | 0.5        | 0.6                                                | 0.85                | 10           | 1          | 1          | 60           | <b>1</b>                    | -             | 1<br>or<br>2 | 1 day              | ++            | -                                                                                                                                                                                                                                                        | -                                                                                                                                                                                                         | -                                          | -                   |
| <b>Wu et al.</b><br>2017<br>[71]   | Rat                                           | Single-element, focused transducer<br><br>Imasonic™<br><br><i>Diagnostic US used to observe MB pharmacodynamics</i> | Various targets | Intact | SonoVue® MBs<br><br>Definity® MBs<br><br>USphere® MBs | <b>4x10<sup>7</sup></b> MBs/kg           | <b>0.4</b> | <b>0.39-0.87</b>                                   | <b>0.62-1.38</b>    | 10           | 1          | 1          | 120          | 1                           | -             | 1            | -                  | ++            | <b>SonoVue® +1.38MPa:</b> Hypointense SWI (microhaemorrhage) lesions detected<br><br><b>Definity® +1.38MPa:</b> Hypointense SWI (microhaemorrhage) lesions detected<br><br><b>USphere® +1.38MPa:</b> Hypointense SWI (microhaemorrhage) lesions detected | <b>0.54MPa:</b> DS=1<br><b>1.38MPa:</b> DS=2<br><br><i>T=4 hours</i><br><br><b>0.54MPa:</b> DS=1<br><b>1.38MPa:</b> DS=2<br><br><b>0.54MPa:</b> DS=1<br><b>1.38MPa:</b> DS=2                              | -<br><br>-<br><br>-                        | -<br><br>-<br><br>- |
| <b>Yang et al.</b><br>2013<br>[72] | Rat                                           | Single-element, focused transducer<br><br>Sonic Concepts™                                                           | Cerebrum        | Intact | SonoVue® MBs                                          | <b>150 or 300 μL/kg</b><br><br>150 μL/kg | 1<br><br>1 | 158 W/cm <sup>2</sup><br><br>158 W/cm <sup>2</sup> |                     | 50<br><br>50 | 1<br><br>1 | 5<br><br>5 | 60<br><br>60 | <b>1</b><br><br><i>2 OL</i> | -<br><br>1200 | 1<br><br>1   | -<br><br>-         | ++<br><br>+++ | -<br><br>-                                                                                                                                                                                                                                               | <b>150μL/kg:</b> DS=1<br><b>300μL/kg:</b> DS=1-2<br><br><i>T=4 or 24 hours</i><br><br>DS=2                                                                                                                | -<br><br>-                                 | -<br><br>-          |
| <b>Yang et al.</b><br>2014<br>[73] | Rat<br>(F98 Glioma model)                     | Single-element, focused transducer<br><br>Sonic Concepts™                                                           | Tumour site     | Intact | SonoVue® MBs                                          | 150 μL/kg                                | 1.04       | 0.9                                                |                     | 50           | 1          | 5          | 60           | 1                           | -             | 1            | -                  | ++            | -                                                                                                                                                                                                                                                        | DS=1<br><br><i>T=7 or 31 hours</i>                                                                                                                                                                        | -                                          | -                   |
| <b>Yang et al.</b><br>2012         | Rat                                           | Single-element, focused transducer                                                                                  | Cerebrum        | Intact | SonoVue® MBs                                          | <b>150-450 μL/kg</b>                     | 1          | 2.86 W                                             |                     | 50           | 1          | 5          | 60           | 1                           | -             | 1            | -                  | ++            | -                                                                                                                                                                                                                                                        | <b>300μL/kg:</b> DS=1-2; apoptotic cells (0.25% of regions)                                                                                                                                               | -                                          | -                   |

|                                  |                           |                                                                             |                     |            |               |              |      |             |               |    |   |     |           |                                                                                     |                |   |   |                 |                                                                                  |                                                                                                                                                                                         |   |   |
|----------------------------------|---------------------------|-----------------------------------------------------------------------------|---------------------|------------|---------------|--------------|------|-------------|---------------|----|---|-----|-----------|-------------------------------------------------------------------------------------|----------------|---|---|-----------------|----------------------------------------------------------------------------------|-----------------------------------------------------------------------------------------------------------------------------------------------------------------------------------------|---|---|
| [74]                             |                           | Panametrics™                                                                |                     |            |               |              |      |             |               |    |   |     |           |                                                                                     |                |   |   |                 |                                                                                  | 450µL/kg: DS=2; apoptotic cells (1.15% of regions)<br><br><i>T=24 hours</i>                                                                                                             |   |   |
| Yang et al.<br>2011<br>[75]      | Rat                       | Single-element, focused transducer<br><br>Panametrics™<br><br>Non-implanted | Cerebrum            | Intact     | SonoVue® MBs  | 150 µL/kg    | 1    | 0.9         | 0.9           | 50 | 1 | 5   | 60        | 1<br>or<br>2                                                                        | 1200s or 2400s | 1 | - | ++              | -                                                                                | 1 Sonication: DS=2 (inflammatory cell aggregation)<br><br>2 Sonications (1200s or 2400s ISI): DS=2 (inflammatory cell aggregation + mild vacuolation)<br><br><i>T=immediately after</i> | - | - |
| Yang et al.<br>2012<br>[76]      | Rat<br>(F98 Glioma Model) | Single-element, focused transducer<br><br>Panametrics™                      | Tumour site         | Intact     | SonoVue® MBs  | 300 µL/kg    | 1    | 5.72W       |               | 50 | 1 | 5   | 60        | 1<br><br><i>Sonications administered 6, 8 and 12 days after tumour implantation</i> | -              | 1 | - | ++              | -                                                                                | DS=1-2<br><br><i>T=30 minutes</i>                                                                                                                                                       | - | - |
| Zhang, Y. et al.<br>2016<br>[77] | Rat                       | 8-element array, focused transducer<br><br>Imasonic™                        | Temporal lobe       | Intact     | In-house MBs  | 300 µL/kg    | 1.5  | 0.69        | 0.56          | 20 | 1 | 2   | 120       | 1                                                                                   | -              | 1 | - | +               | No significant adverse events reported<br><br><i>T=immediately, 1 and 7 days</i> | No significant adverse events reported                                                                                                                                                  | - | - |
| Beccaria et al.<br>2013<br>[78]  | Rabbit                    | SonoCloud® single-element, unfocused transducer<br><br>CarThera™            | Cerebrum            | Craniotomy | SonoVue® MBs  | 30 µL/rabbit | 1.05 | 0.3 and 0.5 | 0.29 and 0.49 | 35 | 1 | 3.5 | 120       | 1                                                                                   | -              | 1 | - | ++<br>(0.5 MPa) | -                                                                                | 0.3 MPa: DS=2<br>0.5 MPa: DS=2                                                                                                                                                          | - | - |
|                                  |                           |                                                                             |                     |            |               | 30 µL/rabbit | 1.05 | 0.5         | 0.49          | 35 | 1 | 3.5 | 120 or 60 | 1                                                                                   | -              | 1 | - | ++              | -                                                                                | 60s SD: DS=2<br>120s SD: DS=2                                                                                                                                                           | - | - |
|                                  |                           |                                                                             |                     |            |               | 30 µL/rabbit | 1.05 | 0.3-0.8     | 0.29-0.78     | 25 | 1 | 2.5 | 120       | 1                                                                                   | -              | 1 | - | +++             | 0.6 MPa: oedema observed via FLAIR MRI                                           | 0.3 MPa: DS=1<br>0.5 MPa: DS=2<br>0.8 MPa: DS=3                                                                                                                                         | - | - |
|                                  |                           |                                                                             |                     |            |               | 30 µL/rabbit | 1.05 | 0.5 and 0.8 | 0.49 and 0.78 | 15 | 1 | 1.5 | 120       | 1                                                                                   | -              | 1 | - | Not reported    | -                                                                                | 0.5 MPa: DS=2<br>0.8 MPa: DS=2                                                                                                                                                          | - | - |
|                                  |                           |                                                                             |                     |            |               | 30 µL/rabbit | 1.05 | 0.8         | 0.78          | 10 | 1 | 1   | 120       | 1                                                                                   | -              | 1 | - | ++              | -                                                                                | DS=2                                                                                                                                                                                    | - | - |
| Chopra et al.<br>2010<br>[39]    | Rabbit                    | Single-element, focused transducer<br><br>In-house                          | Subcortical regions | Intact     | Definity® MBs | 10 µL/kg     | 1.08 | 0.38        | 0.37          | 10 | 1 | 1   | 30-1200   | 4<br>NOLs                                                                           |                | 1 | - | ++              | SD 300s ≤: T2 MRI lesions observed                                               | SD 30s: DS=1<br>SD 180 s: DS=2-3<br>SD 300s: DS=1-3<br>SD 600s: DS=2-3<br>SD 1200s: SD=2-3                                                                                              | - | - |

|                                                  |        |                                                    |                                 |                             |                      |                     |      |                  |                  |     |   |      |           |                               |         |   |   |                          |                                                                                            |                                                                                                                                                                                                                                                                                    |                                                                                                                                                                                                                                                                                                                                            |   |   |
|--------------------------------------------------|--------|----------------------------------------------------|---------------------------------|-----------------------------|----------------------|---------------------|------|------------------|------------------|-----|---|------|-----------|-------------------------------|---------|---|---|--------------------------|--------------------------------------------------------------------------------------------|------------------------------------------------------------------------------------------------------------------------------------------------------------------------------------------------------------------------------------------------------------------------------------|--------------------------------------------------------------------------------------------------------------------------------------------------------------------------------------------------------------------------------------------------------------------------------------------------------------------------------------------|---|---|
| <b>Hynnen et al.</b><br><br>2005<br><br>[1]      | Rabbit | Single-element, focused transducer<br><br>In-house | Cortical locations              | Craniotomy                  | Optison® MBs         | 50 μL/kg            | 0.69 | <b>0.4-3.1</b>   | <b>0.49-3.73</b> | 10  | 1 | 1    | <b>20</b> | <b>1-6</b><br><br><i>NOLs</i> | 300-600 | 1 | - | +                        | (0.4 -1.4 MPa)                                                                             | -                                                                                                                                                                                                                                                                                  | <b>0.4-0.5 MPa: DS=1</b><br><b>0.5-1.4 MPa: DS=2</b> (mild neutrophil infiltration + light vacuolation); <b>few apoptotic and ischaemic cells</b><br><b>2.3 MPa: DS=2-3</b> (mild to moderate parenchymal damage); <b>many apoptotic and ischaemic cells</b><br><b>3.1 MPa: DS=3</b> (necrosis); <b>many apoptotic and ischaemic cells</b> | - | - |
| <b>Hynnen et al.</b><br><br>2006<br><br>[79]     | Rabbit | Single-element, focused transducer<br><br>In-house | Subcortical, cerebral locations | <b>Craniotomy or intact</b> | Optison® MBs         | 50 μL/kg            | 0.26 | <b>0.3-0.9</b>   | <b>0.58-1.77</b> | 10  | 1 | 1    | 20        | <b>1-4</b><br><br><i>NOLs</i> | 300     | 1 | - | +++<br>(0.3 and 0.4 MPa) | -                                                                                          | <b>0.4 MPa: DS=1-2</b> (mild neutrophil infiltration + vacuolization); <b>few apoptotic cells.</b><br>Histological findings were <b>acute (4-24hrs</b> post sonication) and disappeared days after sonication.<br><br><i>No histological findings reported for PNPs &gt;0.4MPa</i> |                                                                                                                                                                                                                                                                                                                                            |   |   |
| <b>McDann old et al.</b><br><br>2006<br><br>[80] | Rabbit | Single-element, focused transducer<br><br>In-house | Thalamus                        | Craniotomy                  | Optison® MBs         | 50 μL/kg            | 0.26 | <b>0.29-0.57</b> | <b>0.57-1.12</b> | 10  | 1 | 1    | 20        | 4<br><br><i>NOLs</i>          | 300+    | 1 | - | +-++                     | -                                                                                          | <b>0.40 MPa: DS=1</b><br><b>0.57 MPa: DS=2</b>                                                                                                                                                                                                                                     | -                                                                                                                                                                                                                                                                                                                                          | - |   |
| <b>McDann old et al.</b><br><br>2007<br><br>[81] | Rabbit | Single-element, focused transducer<br><br>In-house | Thalamus                        | Craniotomy                  | <b>Optison® MBs</b>  | 50 μL/kg            | 0.69 | 0.5              | 0.60             | 10  | 1 | 1    | 20        | 4<br><br><i>NOLs</i>          | 300+    | 1 | - | +                        | -                                                                                          | <b>DS=1-2</b>                                                                                                                                                                                                                                                                      | -                                                                                                                                                                                                                                                                                                                                          | - |   |
|                                                  |        |                                                    |                                 |                             | <b>Definity® MBs</b> | 10 μL/kg            | 0.69 | 0.5              | 0.60             | 10  | 1 | 1    | 20        | 4<br><br><i>NOLs</i>          | 300+    | 1 | - |                          | -                                                                                          | <b>DS=0-1</b>                                                                                                                                                                                                                                                                      | -                                                                                                                                                                                                                                                                                                                                          | - |   |
|                                                  |        |                                                    |                                 |                             | <b>Definity® MBs</b> | 10 μL/kg            | 0.69 | <b>0.4-1.5</b>   | <b>0.48-1.81</b> | 10  | 1 | 1    | 20        | 4<br><br><i>NOLs</i>          | 300+    | 1 | - | +-+++                    | <b>1.1 and 1.5 MPa:</b> T2 hyperintense spots (mild oedema) detected near microhemorrhages | <b>0.4 MPa:</b> DS=0-1<br><b>0.8 MPa:</b> DS=1-2<br><b>1.1 MPa:</b> DS=1-2<br><b>1.5 MPa:</b> DS=2                                                                                                                                                                                 | -                                                                                                                                                                                                                                                                                                                                          | - |   |
| <b>McDann old et al.</b><br><br>2008<br><br>[82] | Rabbit | Single-element, focused transducer<br><br>In-house | Thalamus                        | Craniotomy                  | Optison® MBs         | 50 μL/kg            | 2.04 | <b>0.69-2.3</b>  | <b>0.48-1.61</b> | 10  | 1 | 1    | 20        | 4<br><br><i>NOLs</i>          | 300+    | 1 | - | +                        | -                                                                                          | DS=1                                                                                                                                                                                                                                                                               | -                                                                                                                                                                                                                                                                                                                                          | - |   |
| <b>McDann old et al.</b><br><br>2008             | Rabbit | Single-element, focused transducer                 | Thalamus                        | Craniotomy                  | Optison® MBs         | <b>50-250 μL/kg</b> | 0.69 | 0.5              | 0.60             | 10  | 1 | 1    | 20        | 4<br><br><i>NOLs</i>          | 300+    | 1 | - | +                        | -                                                                                          | <b>DS=1-2</b> (minor parenchymal damage)                                                                                                                                                                                                                                           | -                                                                                                                                                                                                                                                                                                                                          | - |   |
|                                                  |        |                                                    |                                 |                             |                      | 50 μL/kg            | 0.69 | <b>0.8-1.5</b>   | <b>0.96-1.81</b> | 0.1 | 1 | 0.01 | 20        | 4<br><br><i>NOLs</i>          | 300+    | 1 | - | +                        |                                                                                            |                                                                                                                                                                                                                                                                                    |                                                                                                                                                                                                                                                                                                                                            |   |   |

|                                         |                                                          |                                                                           |                                            |                   |               |             |       |                        |                  |                     |              |                 |              |                            |         |          |               |        |                                                                                                                                                          |                                                                                                                                                                              |   |                                                                     |
|-----------------------------------------|----------------------------------------------------------|---------------------------------------------------------------------------|--------------------------------------------|-------------------|---------------|-------------|-------|------------------------|------------------|---------------------|--------------|-----------------|--------------|----------------------------|---------|----------|---------------|--------|----------------------------------------------------------------------------------------------------------------------------------------------------------|------------------------------------------------------------------------------------------------------------------------------------------------------------------------------|---|---------------------------------------------------------------------|
| [83]                                    |                                                          | In-house                                                                  |                                            |                   |               | 50<br>μL/kg | 0.69  | <b>0.5-1.1</b>         | <b>0.60-1.32</b> | 1                   | 1            | 0.1             | 20           | 4<br><i>NOLs</i>           | 300+    | 1        | -             | +      |                                                                                                                                                          | <i>No clear difference in histological findings between locations sonicated with varying parameters</i>                                                                      |   |                                                                     |
|                                         |                                                          |                                                                           |                                            |                   |               | 50<br>μL/kg | 0.69  | 0.5                    | 0.60             | <b>0.1-10</b>       | 1            | <b>0.01-1</b>   | 20           | 4<br><i>NOLs</i>           | 300+    | 1        | -             | +      |                                                                                                                                                          |                                                                                                                                                                              |   |                                                                     |
|                                         |                                                          |                                                                           |                                            |                   |               | 50<br>μL/kg | 0.69  | 0.5                    | 0.60             | 10                  | <b>0.5-5</b> | <b>0.5-5</b>    | 20           | 4<br><i>NOLs</i>           | 300+    | 1        | -             | 0      |                                                                                                                                                          |                                                                                                                                                                              |   |                                                                     |
| <b>Mei et al.</b><br>2009<br>[84]       | Rabbit                                                   | Single-element, focused transducer<br><br>In-house                        | Various cortical and subcortical locations | Craniotomy        | SonoVue® MBs  | 30<br>μL/kg | 1.1   | 6W/0.07cm <sup>2</sup> |                  | Continuous delivery |              |                 | <b>6-10s</b> | 2-4<br><i>NOLs</i>         | 300-600 | 1        | -             | ++     | -                                                                                                                                                        | <b>6s: DS=1</b><br><b>8s: DS=2</b> (sight vacuolation, and mild ischaemic changes)<br><b>10s: DS=3</b> (extensive vacuolation, tissue necrosis, neutrophil infiltration)     | - | -                                                                   |
| <b>Wang et al.</b><br>2009<br>[85]      | Rabbit                                                   | Single-element, focused transducer<br><br>In-house                        | Various cortical and subcortical locations | Craniotomy        | SonoVue® MBs  | 30<br>μL/kg | 1.1   | 6W/0.07cm <sup>2</sup> |                  | Continuous delivery |              |                 | 6            | 2-3<br><i>NOLs</i>         | 300+    | 1        | -             | ++     | -                                                                                                                                                        | -                                                                                                                                                                            | - | -                                                                   |
| <b>O'Reilly et al.</b><br>2017<br>[86]  | Dog<br><i>(Aged dogs with significant comorbidities)</i> | Single-element, focused transducer<br><br>In-house                        | Various cortical and subcortical locations | Intact            | Definity® MBs | 20<br>μL/kg | 0.28  | <b>0.81-1</b>          | <b>1.53-1.89</b> | 10                  | 0.33         | 0.33            | 180          | <b>6</b><br><i>NOLs</i>    | 300+    | 1        | -             | +      | <b>Thermal damage observed on overlying muscle</b> attributed to technical error                                                                         | -                                                                                                                                                                            | - | No changes in neurological testing and mental status                |
|                                         |                                                          |                                                                           |                                            |                   |               | 20<br>μL/kg | 0.28  | <b>0.6-1.2</b>         | <b>1.13-2.27</b> | 10                  | 1            | 1               | 120          | <b>9-13</b><br><i>NOLs</i> | 300+    | <b>1</b> | -             | + - ++ | -                                                                                                                                                        | DS=1                                                                                                                                                                         | - | No changes in neurological testing and mental status                |
|                                         |                                                          |                                                                           |                                            |                   |               | 20<br>μL/kg | 0.28  | <b>0.6-1.2</b>         | <b>1.13-2.27</b> | 10                  | 1            | 1               | 120          | <b>7-12</b><br><i>NOLs</i> | 300+    | <b>4</b> | <b>Weekly</b> | + - ++ | <i>T2 and T2*W MRI results not reported</i>                                                                                                              | DS=1                                                                                                                                                                         | - | Vomiting and bloody urine observed after second session in 1/5 dogs |
| <b>Liu et al.</b><br>2011<br>[87]       | Pig                                                      | Single-element, unfocused transducer<br><br>K-Sonic™ Inc.                 | Frontal Cortex                             | <b>Craniotomy</b> | SonoVue® MBs  | 50<br>μL/kg | 0.028 | 0.8                    | 4.78             | <b>30 or 100</b>    | 1            | <b>3 or 10</b>  | 300          | 1                          | -       | 1        | -             | + - ++ | <b>30ms: T2 hyperintense (oedema) lesions detected</b><br><b>100ms: T2 hyperintense (oedema) + T2* hypointense (micro-haemorrhagic) lesions detected</b> | <b>30ms: DS=1; mild iron deposition</b> (hemosiderin)<br><br><b>100ms: DS=3</b> (parenchymal damage); <b>extensive iron deposition</b> (hemosiderin); <b>apoptotic cells</b> | - | -                                                                   |
|                                         |                                                          |                                                                           |                                            | <b>Intact</b>     |               | 50<br>μL/kg | 0.028 | 0.8                    | 4.78             | 100                 | 1            | 1               | 300          | 1                          | -       | 1        | -             | +      | -                                                                                                                                                        | -                                                                                                                                                                            | - | -                                                                   |
| <b>Pelekanos et al.</b><br>2018<br>[88] | Sheep                                                    | Single-element, focused ultrasound transducer<br><br>Sonic Concepts™ Inc. | Cortical and hippocampal locations         | Intact            | Definity® MBs | 10<br>μL/kg | 0.286 | 0.42                   | 0.79             | <b>1 or 10</b>      | 2            | <b>0.2 or 2</b> | 120          | 5 or 6<br><i>NOLs</i>      | 600+    | 1        | -             | +      | $\Delta T \leq 1.76^{\circ}\text{C}$ compared to unsonicated skull                                                                                       | -                                                                                                                                                                            | - | -                                                                   |
|                                         |                                                          |                                                                           |                                            |                   |               |             | 0.286 | <b>0.42-0.72</b>       | <b>0.79-1.35</b> | 1                   | 2            | 0.2             | 120          | 5 or 11<br><i>NOLs</i>     | 600+    | 1        | -             | +      | <i>Average number of petechiae per slice macroscopically detected</i><br><br><b>0.42 MPa: 0.63</b><br><b>0.63 MPa: 5.87</b>                              | <b>0.63 MPa≤: DS=1-2; few ischaemic cells detected</b>                                                                                                                       | - | -                                                                   |

|                                  |       |                                                                                    |                                                       |            |               |                                                          |      |              |              |      |      |      |     |                      |    |                               |                |     |                                                                                     |                                |   |                                                                         |
|----------------------------------|-------|------------------------------------------------------------------------------------|-------------------------------------------------------|------------|---------------|----------------------------------------------------------|------|--------------|--------------|------|------|------|-----|----------------------|----|-------------------------------|----------------|-----|-------------------------------------------------------------------------------------|--------------------------------|---|-------------------------------------------------------------------------|
|                                  |       |                                                                                    |                                                       |            |               |                                                          |      |              |              |      |      |      |     |                      |    |                               |                |     | 0.72 MPa: 8.74<br>$\Delta T \leq 1.76^\circ C$<br>compared to<br>unsonicated skull  |                                |   |                                                                         |
| Yoon et al.<br>2019<br>[89]      | Sheep | Single-element, focused ultrasound transducer<br><br>Ultran Group™                 | Subcortical locations                                 | Intact     | Definity® MBs | 10 µL/kg                                                 | 0.25 | 0.48 or 0.58 | 0.96 or 1.16 | 10   | 1    | 1    | 120 | 1                    | -  | 1                             | -              | +   | 0.58 MPa: SWI hypointense (haemorrhagic) lesions detected                           | 0.58 MPa: DS=2                 | - | -                                                                       |
| Arvantis et al.<br>2012<br>[90]  | NHP   | ExAblate 4000® 1024-element phase array, focused transducer<br><br>InSightec™ Ltd. | Lateral geniculate nucleus, amygdala, cingulate gyrus | Intact     | Definity® MBs | 20 µL/kg<br><br><i>Infusion</i>                          | 0.22 | 0.13-0.28    | 0.28-0.60    | 10   | 0.55 | 0.55 | 50  | 3<br><br><i>NOLs</i> | 25 | 10                            | 2 mins         | +   | T2* hypointense (micro-haemorrhagic) lesions detected<br><br><i>T=minutes after</i> | DS=0-2<br><br><i>T=2 hours</i> | - | -                                                                       |
|                                  |       |                                                                                    |                                                       |            |               |                                                          | 0.22 | 0.1-0.3      | 0.21-0.64    | 10   | 0.55 | 0.55 | 50  | 3<br><br><i>NOLs</i> | 25 | 16-40                         | Over 5-7 weeks | +   | T2* hypointense (micro-haemorrhagic) lesions detected                               | -                              | - | -                                                                       |
| Downs et al.<br>2015<br>[91, 92] | NHP   | Single-element, focused transducer<br><br>Sonic Concepts™                          | Caudate, putamen, thalamus                            | Intact     | In-house MBs  | 2.5 x 10 <sup>8</sup> MBs/kg<br><i>Non-anaesthetised</i> | 0.5  | 0.3          | 0.42         | 10   | 2    | 2    | 120 | 1                    | -  | 9<br><i>NHP A or 10 NHP B</i> | Not specified  | +++ | NHP 1: Transient T2 hyperintense (oedema) lesions detected after one session        | -                              | - | No changes to motor function<br><br>No EMG changes at temporalis muscle |
|                                  |       |                                                                                    |                                                       | Intact     |               | 2.5 x 10 <sup>8</sup> MBs/kg<br><i>Anaesthetised</i>     | 0.5  | 0.3          | 0.42         | 10   | 2    | 2    | 120 | 1                    | -  | 5<br><i>NHP A or 13 NHP B</i> | Over 10 months | +   | NHP 1: Transient T2 hyperintense (oedema) spots detected after the last 3 sessions  | -                              | - | Both NHPs: Transient decrease in reaction times                         |
|                                  |       |                                                                                    |                                                       |            |               | 2.5 x 10 <sup>8</sup> MBs/kg                             | 0.5  | 0.2-0.4      | 0.28-0.57    | 10   | 2    | 2    | 120 | 1                    | -  | 27                            | Over 12 months | +   | 0.4 MPa: Transient T2 hyperintense (oedema) spots detected after the last session   | -                              | - | Both NHPs: Transient decrease in reaction times                         |
|                                  |       |                                                                                    |                                                       |            |               | 2.5 x 10 <sup>8</sup> MBs/kg                             | 0.5  | 0.2-0.275    | 0.28-0.39    | 10   | 2    | 2    | 120 | 1                    | -  | 18                            | Over 20 months | ++  | -                                                                                   | -                              | - | Transient increase in reaction times                                    |
|                                  |       |                                                                                    |                                                       |            |               | 2.5 x 10 <sup>8</sup> MBs/kg                             | 0.5  | 0.4          | 0.57         | 10   | 2    | 2    | 120 | 1                    | -  | 4                             | Over 4 months  | +++ | -                                                                                   | -                              | - | Transient increase in reaction times                                    |
| Goldwirth et al.<br>2016<br>[93] | NHP   | Single-element, unfocused transducer<br><br>In-house                               | Motor cortex                                          | Craniotomy | SonoVue® MBs  | 100 µL/kg                                                | 1.05 | 0.9          | 0.88         | 23.2 | 1    | 2.32 | 134 | 1                    | -  | 1                             | -              | -   | -                                                                                   | -                              | - | -                                                                       |

|                                                          |       |                                                                                               |                                                                                  |            |                                                                          |                                    |      |                        |                         |      |      |      |     |                                           |                           |                |                  |     |                                                                                                                                                      |                                                                          |   |                                                                                                                                                                                       |                                                    |
|----------------------------------------------------------|-------|-----------------------------------------------------------------------------------------------|----------------------------------------------------------------------------------|------------|--------------------------------------------------------------------------|------------------------------------|------|------------------------|-------------------------|------|------|------|-----|-------------------------------------------|---------------------------|----------------|------------------|-----|------------------------------------------------------------------------------------------------------------------------------------------------------|--------------------------------------------------------------------------|---|---------------------------------------------------------------------------------------------------------------------------------------------------------------------------------------|----------------------------------------------------|
| <b>Horodyc<br/>kid et al.</b><br><br>2017<br><br>[94]    | NHP   | SonoCloud®<br>single-element,<br>unfocused<br>transducer<br><br>CarThera™                     | Motor<br>cortex                                                                  | Craniotomy | SonoVue®<br>MBs                                                          | 100<br>μL/kg                       | 1.05 | <b>0.6-0.8</b>         | <b>0.59-<br/>0.78</b>   | 23.2 | 1    | 2.32 | 131 | 1                                         | -                         | 7              | 15 days          | ++  | FLAIR hyperintense<br>spots detected in<br>subarachnoid space<br><br>(further T2* imaging<br>ruled out<br>subarachnoid<br>haemorrhage)               | Mild hemosiderin<br>deposition observed in<br>cortical region of one NHP | - | Transient tachypnoea<br>observed in 20% of<br>sonications, normal<br>clinical and behavioural<br>testing scores.<br><br>No EEG or SSEP<br>alterations attributable<br>post-sonication |                                                    |
| <b>Marquet<br/>et al.</b><br><br>2014<br><br>[95]        | NHP   | Single-element,<br>focused<br>transducer<br><br>Sonic<br>Concepts™                            | Striatum                                                                         | Intact     | In-house<br>MBs                                                          | 500<br>μL/NHP                      | 0.5  | <b>0.2-0.3</b>         | <b>0.28-<br/>0.42</b>   | 10   | 2    | 2    | 120 | 1                                         | -                         | 10<br>sessions | 2 weeks          | N/A | -                                                                                                                                                    | -                                                                        | - | -                                                                                                                                                                                     |                                                    |
|                                                          |       |                                                                                               |                                                                                  |            |                                                                          | 500<br>μL/NHP                      | 0.5  | <b>0.2-0.3</b>         | <b>0.28-<br/>0.42</b>   | 10   | 2    | 2    | 120 | 1                                         | -                         | 7<br>sessions  | 2 weeks          | N/A | -                                                                                                                                                    | -                                                                        | - | Grossly normal<br>cognitive and motor<br>behaviour                                                                                                                                    |                                                    |
| <b>Marquet<br/>et al.</b><br><br>2011<br><br>[96]        | NHP   | Single-element,<br>focused<br>transducer<br><br>Riverside<br>Research<br>Institute™           | Visual<br>cortex,<br>caudate,<br>hippocampus                                     | Intact     | <b>In-house<br/>MBs</b><br><i>(1<sup>st</sup> session<br/>in NHP 1)</i>  | 500<br>μL/NHP                      | 0.5  | <b>0.3 or<br/>0.45</b> | <b>0.42 or<br/>0.64</b> | 10   | 2    | 2    | 120 | 2<br><i>NOLs at<br/>visual<br/>cortex</i> | Imme-<br>diately<br>after | 2<br>sessions  | Not<br>specified | +   | -                                                                                                                                                    | -                                                                        | - | -                                                                                                                                                                                     | Grossly normal<br>cognitive and motor<br>behaviour |
|                                                          |       |                                                                                               |                                                                                  |            | <b>Definity®<br/>MBs</b><br><i>(2<sup>nd</sup> session<br/>in NHP 1)</i> | 500<br>μL/NHP                      | 0.5  | <b>0.6</b>             | <b>0.85</b>             | 10   | 2    | 2    | 120 | 1<br><i>Hippocampus</i>                   | -                         |                |                  |     |                                                                                                                                                      |                                                                          |   |                                                                                                                                                                                       |                                                    |
|                                                          |       |                                                                                               |                                                                                  |            | <b>In-house<br/>MBs</b><br><i>(NHP 2)</i>                                | 500<br>μL/NHP                      | 0.5  | <b>0.6</b>             | <b>0.85</b>             | 10   | 2    | 2    | 120 | 1<br><i>Caudate</i>                       | -                         | 1<br>session   | -                | +   | T2 hyperintense<br>(oedematous) lesions                                                                                                              | -                                                                        | - | Reversible contralateral<br>arm weakness, resolving<br>after four days.<br><br>Grossly normal<br>cognitive behaviour                                                                  |                                                    |
| <b>McDann<br/>old et al.</b><br><br>2012<br><br>[97]     | NHP   | ExAblate 4000®<br>1024-element<br>phase array,<br>focused<br>transducer<br><br>InSightec™ Ltd | Thalamus,<br>putmen,<br>cingulate<br>cortex,<br>visual<br>cortex,<br>hippocampus | Intact     | Definity®<br>MBs                                                         | 10<br>μL/kg                        | 0.22 | <b>0.19-<br/>0.66</b>  | <b>0.41-<br/>1.41</b>   | 10   | 1    | 1    | 70  | 1                                         | Not<br>specifi-<br>ed     | 1-13           | 1 or 2<br>weeks  | ++  | <b>0.36 MPa &lt;</b> ; T2*<br>hypointense<br>(haemorrhagic)<br>lesions detected in<br>50%+ of sonicated<br>sites<br><br><i>T = immediately after</i> | <b>0.7 MPa</b> ; DS=2<br><br><i>T = 2-48 hours and 2<br/>weeks</i>       |   | No adverse behavioural<br>outcomes, including in<br>motor testing, visual task<br>performance or visual<br>acuity<br><br><i>T= days after</i>                                         |                                                    |
|                                                          |       |                                                                                               |                                                                                  |            |                                                                          | <b>Bolus</b><br>20<br>μL/kg        | 0.22 | <b>0.19-<br/>0.7</b>   | <b>0.41-<br/>1.49</b>   | 10   | 1    | 1    | 50  | 9                                         | 25                        | 5              | Months           |     |                                                                                                                                                      |                                                                          |   |                                                                                                                                                                                       |                                                    |
|                                                          |       |                                                                                               |                                                                                  |            |                                                                          | <b>Infusion</b>                    |      |                        |                         |      |      |      |     |                                           |                           |                |                  |     |                                                                                                                                                      |                                                                          |   |                                                                                                                                                                                       |                                                    |
| <b>Pouliopo-<br/>ulos et al.</b><br><br>2019<br><br>[98] | NHP   | Single-element<br>focused<br>transducer<br><br>Sonic<br>Concepts™                             | Thalamus<br>and<br>dorsolateral<br>prefrontal<br>cortex                          | Intact     | Definity®<br>MBs                                                         | 10<br>μL/kg                        | 0.25 | 0.2                    | 0.4                     | 10   | 2    | 2    | 120 | 1                                         | -                         | 1              | -                | -   | No MRI evidence of<br>haemorrhagic or<br>oedematous change<br><br><i>T= 1 hour</i>                                                                   | -                                                                        | - | -                                                                                                                                                                                     |                                                    |
| <b>Wu et al.</b><br><br>2016<br><br>[99]                 | NHP   | Single-element<br>focused<br>transducer<br><br>Sonic<br>Concepts™                             | Striatum                                                                         | Intact     | In-house<br>MBs                                                          | 2.5 x<br>10 <sup>8</sup><br>MBs/kg | 0.5  | 0.2-0.6                | 0.28-<br>0.85           | 10   | 2    | 2    | 120 | 1 or 2                                    | 1200                      | 4-24           | Weekly           | ++  | No MRI evidence of<br>haemorrhagic or<br>oedematous change<br><br><i>T= 1 hour</i>                                                                   | -                                                                        | - | -                                                                                                                                                                                     |                                                    |
| <b>Abraham<br/>et al.</b>                                | Human | ExAblate 4000®<br>1024-element<br>phase array,                                                | Primary<br>motor<br>cortex                                                       | Intact     | Definity®<br>MBs                                                         | 4<br>μL/kg                         | 0.22 | <b>6-10W</b>           |                         | 2.6  | 30.3 | 7.88 | 90  | 3                                         | Not<br>specifi-<br>ed     | 1              | -                |     | Transient,<br>asymptomatic FLAIR<br>hyperintense                                                                                                     | -                                                                        | - | Moderate adverse events<br>related to the procedure<br>( <b>headache/scalp pain</b> )                                                                                                 |                                                    |

|                                             |                                                |                                                                                  |                                         |            |               |                                    |      |                              |                  |      |                 |                     |                  |                             |               |             |           |      |                                                                                                          |                                                                              |   |                                                                                                                                                                   |
|---------------------------------------------|------------------------------------------------|----------------------------------------------------------------------------------|-----------------------------------------|------------|---------------|------------------------------------|------|------------------------------|------------------|------|-----------------|---------------------|------------------|-----------------------------|---------------|-------------|-----------|------|----------------------------------------------------------------------------------------------------------|------------------------------------------------------------------------------|---|-------------------------------------------------------------------------------------------------------------------------------------------------------------------|
| 2019<br>[100]                               | (ALS patients )                                | focused transducer<br>InSightec™ Ltd.                                            | (corresponding to arm or leg region)    |            |               | <i>Patient 1</i><br>4 μL/kg        | 0.22 | <b>4 and 8W</b>              |                  | 2.6  | 30.3            | 7.88                | 90               | 2                           | Not specified | 1           | -         |      | (oedematous) lesion detected in patient 4                                                                |                                                                              |   | due to stereotactic frame placement, <b>musculoskeletal pain</b> ) were reported<br><br>No EEG changes reported.rea                                               |
|                                             |                                                |                                                                                  |                                         |            |               | <i>Patient 2</i><br>4 μL/kg        | 0.22 | <b>8-10W</b>                 |                  | 2.6  | 30.3            | 7.88                | 90               | 4                           | Not specified | 1           | -         |      |                                                                                                          |                                                                              |   |                                                                                                                                                                   |
|                                             |                                                |                                                                                  |                                         |            |               | <i>Patient 3</i><br>4 μL/kg        | 0.22 | <b>4-7W</b>                  |                  | 2.6  | 30.3            | 7.88                | 90               | 3                           | Not specified | 1           | -         |      |                                                                                                          |                                                                              |   |                                                                                                                                                                   |
|                                             |                                                |                                                                                  |                                         |            |               | <i>Patient 4</i><br>4 μL/kg        | 0.22 | <b>4-7W</b>                  |                  | 2.6  | 30.3            | 7.88                | 90               | 3                           | Not specified | 1           | -         |      |                                                                                                          |                                                                              |   |                                                                                                                                                                   |
| <b>Anastasiadis et al.</b><br>2021<br>[101] | Human (Infiltrating glioma patients )          | ExAblate Neuro 2® 1024-element phase array, focused transducer<br>InSightec™ Ltd | Tumour site                             | Intact     | Definity® MBs | 4-5 μL/kg<br><i>Up to 20 μL/kg</i> | 0.23 | <b>3.38-21.55 W</b>          |                  |      |                 | 8                   | 90               | Not specified               | Not specified | 1           | -         |      | Transient, T2* hypointense lesions detected in 50% of sonication sites                                   | DS=0                                                                         |   |                                                                                                                                                                   |
| <b>Chen et al.</b><br>2021<br>[102]         | Human (Glioblastoma multiforme patients )      | NaviFUS® multi-element phase array, focused transducer<br>NaviFUS™ Corp.         | Peritumoral site<br><br><i>3x3 grid</i> | Intact     | SonoVue® MBs  | 100 μL/kg<br>(max dose 4.8 mL)     | 0.5  | <b>0.48-0.68</b>             | <b>0.48-0.68</b> | 10   | 9               | 9                   | 120              | <b>1-3</b>                  | Not specified | 1           | -         | +--+ | No MRI evidence of haemorrhagic or oedematous change                                                     | Lack of lymphocytic (CD4+, CD8+ and FOXP3+) and macrophagic (CD68+) response | - | 2 serious adverse events: hyponatremia in n=1<br><br>36, other adverse events in n=5                                                                              |
| <b>Gasca-Salas et al.</b><br>2021<br>[103]  | Human (Parkinson's disease demented patients ) | ExAblate Neuro 2® 1024-element phase array, focused transducer<br>InSightec™ Ltd | Parieto-occipito-temporal junction      | Intact     | Luminy® MBs   | 4 μL/kg                            | 0.22 | <b>5-60 W</b>                |                  |      |                 |                     |                  | <b>2-8</b>                  | Not specified | 2           | 2-3 weeks |      | SWAN hypointensities detected upon 1 week in n=2<br><br>No alterations in FDG or Flutemetamol PET uptake | -                                                                            | - | No impairments in any neuropsychological domains tested<br><br>No alterations in physical impairment                                                              |
| <b>Idbaidh et al.</b><br>2019<br>[104]      | Human (Glioblastoma multiform patients )       | SonoCloud® single-element, unfocused transducer<br>CarThera™                     | Tumour and peritumoral parenchyma       | Craniotomy | SonoVue® MBs  | 100 μL/kg                          | 1.05 | <b>0.78-1.15</b>             | <b>0.76-1.12</b> | 23.8 | <b>0.5 or 1</b> | <b>1.19 or 2.38</b> | <b>150 - 270</b> | 1                           | -             | <b>1-10</b> | Monthly   | +    | Peritumoral oedema detected on MRI after 2 sessions (0.78 MPa; 1.03 MPa)                                 | --                                                                           | - | Transient facial palsy occurred in 1 patient (0.90 MPa); resolving within 2 hours.<br><br>One death outside of glioblastoma progression occurred during the trial |
| <b>Lipsman et al.</b><br>2018               | Human (Alzheimer's )                           | ExAblate 4000® 1024-element phase array,                                         | Dorsolateral prefrontal cortex          | Intact     | Definity® MBs | 4 μL/kg                            | 0.22 | <b>7.5W</b><br><b>3-3.5W</b> |                  | 2    | 30              | 6                   | 50               | 1 (1 <sup>st</sup> session) | Not specified | <b>2</b>    | 1 month   |      | Transient T2* hypointense (potential microhemorrhage) spots detected                                     | -                                                                            | - | Transient increase in Neuropsychiatric Inventory Questionnaire                                                                                                    |

|                                               |                                                               |                                                                                                |                                            |        |                  |                                                |      |                                       |  |     |      |      |                                                   |                                                                                         |                      |                                                                    |         |                                                                               |                                                            |                                                   |                                                                                |                                                                                                                       |
|-----------------------------------------------|---------------------------------------------------------------|------------------------------------------------------------------------------------------------|--------------------------------------------|--------|------------------|------------------------------------------------|------|---------------------------------------|--|-----|------|------|---------------------------------------------------|-----------------------------------------------------------------------------------------|----------------------|--------------------------------------------------------------------|---------|-------------------------------------------------------------------------------|------------------------------------------------------------|---------------------------------------------------|--------------------------------------------------------------------------------|-----------------------------------------------------------------------------------------------------------------------|
| [105]                                         | patients<br>)                                                 | focused<br>transducer<br><br>InSightec™ Ltd.                                                   | (white<br>matter)                          |        |                  |                                                |      |                                       |  |     |      |      | 2 (2 <sup>nd</sup><br>session)<br><br><i>NOLs</i> |                                                                                         |                      |                                                                    |         |                                                                               |                                                            | (NPI-Q) score 1 month<br>after second US session. |                                                                                |                                                                                                                       |
|                                               |                                                               |                                                                                                |                                            |        |                  | 4<br>μL/kg                                     | 0.22 | <b>5-6W</b><br><br><b>4-7W</b>        |  | 2   | 30   | 6    | 50                                                | 1 (1 <sup>st</sup> )<br><br>2 (2 <sup>nd</sup> )<br><br><i>NOLs</i>                     | Not<br>specifi<br>ed | <b>2</b>                                                           | 1 month | -                                                                             | -                                                          | -                                                 | No adverse physical or<br>behavioural outcomes                                 |                                                                                                                       |
|                                               |                                                               |                                                                                                |                                            |        |                  | 4<br>μL/kg                                     | 0.22 | <b>3W</b><br><br><b>2.5-3.5<br/>W</b> |  | 2   | 30   | 6    | 50                                                | 1 (1 <sup>st</sup><br>session)<br><br>2 (2 <sup>nd</sup><br>session)<br><br><i>NOLs</i> | Not<br>specifi<br>ed | <b>2</b>                                                           | 1 month | -                                                                             | -                                                          | -                                                 | No adverse physical or<br>behavioural outcomes                                 |                                                                                                                       |
|                                               |                                                               |                                                                                                |                                            |        |                  | 4<br>μL/kg                                     | 0.22 | <b>3.5W</b><br><br><b>3.5-<br/>5W</b> |  | 2   | 30   | 6    | 50                                                | 1 (1 <sup>st</sup><br>session)<br><br>2 (2 <sup>nd</sup><br>session)<br><br><i>NOLs</i> | Not<br>specifi<br>ed | <b>2</b>                                                           | 1 month | Transient T2*<br>hypointense (potential<br>microhemorrhage)<br>spots detected | -                                                          | -                                                 | No adverse physical or<br>behavioural outcomes                                 |                                                                                                                       |
|                                               |                                                               |                                                                                                |                                            |        |                  |                                                |      |                                       |  |     |      |      |                                                   |                                                                                         |                      |                                                                    |         |                                                                               |                                                            |                                                   |                                                                                |                                                                                                                       |
| Mainpri<br>ze et al.<br><br>2019<br><br>[106] | Human<br>(Malign<br>ant<br>glioma<br>patients<br>)            | ExAblate 4000®<br>1024-element<br>phase array,<br>focused<br>transducer<br><br>InSightec™ Ltd. | Tumour and<br>peritumoral<br>parenchyma    | Intact | Definity®<br>MBs | 4<br>μL/kg                                     | 0.22 | <b>5-9 W</b>                          |  | 2.6 | 30.3 | 7.88 | 50                                                | 2                                                                                       | Not<br>specifi<br>ed | <b>1</b>                                                           | -       | -                                                                             | -                                                          | -                                                 | Minor pain due to<br>stereotactic frame<br>placement reported in 2<br>patients |                                                                                                                       |
|                                               |                                                               |                                                                                                |                                            |        |                  | 4<br>μL/kg                                     | 0.22 | <b>8-10W</b>                          |  | 2.6 | 30.3 | 7.88 | 50                                                | 5                                                                                       | Not<br>specifi<br>ed | <b>1</b>                                                           | -       |                                                                               |                                                            |                                                   |                                                                                |                                                                                                                       |
|                                               |                                                               |                                                                                                |                                            |        |                  | 4<br>μL/kg                                     | 0.22 | <b>6-<br/>7.5W</b>                    |  | 2.6 | 30.3 | 7.88 | 50                                                | 2                                                                                       | Not<br>specifi<br>ed | <b>1</b>                                                           | -       |                                                                               |                                                            |                                                   |                                                                                |                                                                                                                       |
|                                               |                                                               |                                                                                                |                                            |        |                  | 4<br>μL/kg                                     | 0.22 | <b>4-15W</b>                          |  | 2.6 | 30.3 | 7.88 | 50                                                | 5                                                                                       | Not<br>specifi<br>ed | <b>1</b>                                                           | -       |                                                                               |                                                            |                                                   |                                                                                |                                                                                                                       |
| Park et<br>al,<br><br>2020<br><br>[107]       | Human<br>(Gliobl<br>astoma<br>multifor<br>me<br>patients<br>) | ExAblate 4000®<br>1024-element<br>phase array,<br>focused<br>transducer<br><br>InSightec™ Ltd  | Peritumoral<br>site<br><br><i>3x3 grid</i> | Intact | Definity®<br>MBs | 4<br>μL/kg<br><br>(Max<br>dose<br>20<br>μL/kg) | 0.22 |                                       |  | 2.6 | 30.4 | 7.90 | 80<br>(ave<br>rage<br>)                           | 3.66<br>(average)<br><i>3x3 grid</i>                                                    | 174                  | <b>3</b><br><i>(n=1)</i><br><br>or<br><br><b>6</b><br><i>(n=5)</i> | 4 weeks | -                                                                             | No MRI evidence of<br>haemorrhagic or<br>oedematous change | -                                                 | -                                                                              | No cognitive or<br>neurological deficits<br>related to BBBB<br><br>1 adverse event related<br>to temozolomide therapy |



## References

1. Hynynen, K., N. McDannold, N.A. Sheikov, F.A. Jolesz, and N. Vykhodtseva, *Local and reversible blood-brain barrier disruption by noninvasive focused ultrasound at frequencies suitable for trans-skull sonications*. Neuroimage, 2005. **24**(1): p. 12-20.
2. Baghirov, H., S. Snipstad, E. Sulheim, S. Berg, R. Hansen, F. Thorsen, Y. Morch, C.L. Davies, and A.K.O. Aslund, *Ultrasound-mediated delivery and distribution of polymeric nanoparticles in the normal brain parenchyma of a metastatic brain tumour model*. PLoS One, 2018. **13**(1): p. e0191102.
3. Baseri, B., J.J. Choi, Y.S. Tung, and E.E. Konofagou, *Multi-modality safety assessment of blood-brain barrier opening using focused ultrasound and definity microbubbles: a short-term study*. Ultrasound Med Biol, 2010. **36**(9): p. 1445-59.
4. Bing, K.F., G.P. Howles, Y. Qi, M.L. Palmeri, and K.R. Nightingale, *Blood-Brain Barrier (BBB) Disruption Using a Diagnostic Ultrasound Scanner and Definity in Mice*. Ultrasound in Medicine and Biology, 2009. **35**(8): p. 1298-1308.
5. Chen, C.C., P.S. Sheeran, S.Y. Wu, O.O. Olumolade, P.A. Dayton, and E.E. Konofagou, *Targeted drug delivery with focused ultrasound-induced blood-brain barrier opening using acoustically-activated nanodroplets*. J Control Release, 2013. **172**(3): p. 795-804.
6. Chen, H. and E.E. Konofagou, *The size of blood-brain barrier opening induced by focused ultrasound is dictated by the acoustic pressure*. J Cereb Blood Flow Metab, 2014. **34**(7): p. 1197-204.
7. Choi, J.J., J.A. Feshitan, B. Baseri, S. Wang, Y.S. Tung, M.A. Borden, and E.E. Konofagou, *Microbubble-size dependence of focused ultrasound-induced blood-brain barrier opening in mice in vivo*. IEEE Trans Biomed Eng, 2010. **57**(1): p. 145-54.
8. Choi, J.J., K. Selert, Z. Gao, G. Samiotaki, B. Baseri, and E.E. Konofagou, *Noninvasive and localized blood-brain barrier disruption using focused ultrasound can be achieved at short pulse lengths and low pulse repetition frequencies*. J Cereb Blood Flow Metab, 2011. **31**(2): p. 725-737.
9. Choi, J.J., K. Selert, F. Vlachos, A. Wong, and E.E. Konofagou, *Noninvasive and localized neuronal delivery using short ultrasonic pulses and microbubbles*. Proc Natl Acad Sci U S A, 2011. **108**(40): p. 16539-16544.
10. Choi, J.J., S. Wang, T.R. Brown, S.A. Small, K.E. Duff, and E.E. Konofagou, *Noninvasive and transient blood-brain barrier opening in the hippocampus of Alzheimer's double transgenic mice using focused ultrasound*. Ultrason Imaging, 2008. **30**(3): p. 189-200.
11. Choi, J.J., S. Wang, Y.S. Tung, B. Morrison, 3rd, and E.E. Konofagou, *Molecules of various pharmacologically-relevant sizes can cross the ultrasound-induced blood-brain barrier opening in vivo*. Ultrasound Med Biol, 2010. **36**(1): p. 58-67.
12. Englander, Z.K., et al., *Focused ultrasound mediated blood-brain barrier opening is safe and feasible in a murine pontine glioma model*. Sci Rep, 2021. **11**(1): p. 6521.
13. Jordao, J.F., et al., *Amyloid-beta plaque reduction, endogenous antibody delivery and glial activation by brain-targeted, transcranial focused ultrasound*. Exp Neurol, 2013. **248**: p. 16-29.
14. Kinoshita, M., N. McDannold, F.A. Jolesz, and K. Hynynen, *Noninvasive localized delivery of Herceptin to the mouse brain by MRI-guided focused ultrasound-induced blood-brain barrier disruption*. Proc Natl Acad Sci U S A, 2006. **103**(31): p. 11719-11723.

15. Kinoshita, M., N. McDannold, F.A. Jolesz, and K. Hynynen, *Targeted delivery of antibodies through the blood-brain barrier by MRI-guided focused ultrasound*. Biochem Biophys Res Commun, 2006. **340**(4): p. 1085-1090.
16. Lapin, N.A., K. Gill, B.R. Shah, and R. Chopra, *Consistent opening of the blood brain barrier using focused ultrasound with constant intravenous infusion of microbubble agent*. Sci Rep, 2020. **10**(1): p. 16546.
17. Liu, H.L., C.Y. Huang, J.Y. Chen, H.Y. Wang, P.Y. Chen, and K.C. Wei, *Pharmacodynamic and therapeutic investigation of focused ultrasound-induced blood-brain barrier opening for enhanced temozolomide delivery in glioma treatment*. PLoS One, 2014. **9**(12): p. e114311.
18. McDannold, N., Y. Zhang, and N. Vykhodtseva, *The Effects of Oxygen on Ultrasound-Induced Blood-Brain Barrier Disruption in Mice*. Ultrasound Med Biol, 2017. **43**(2): p. 469-475.
19. McMahan, D., L. Deng, and K. Hynynen, *Comparing rapid short-pulse to tone burst sonication sequences for focused ultrasound and microbubble-mediated blood-brain barrier permeability enhancement*. J Control Release, 2020.
20. Morse, S.V., A. Mishra, T.G. Chan, T.M.d.R. R, and J.J. Choi, *Liposome delivery to the brain with rapid short-pulses of focused ultrasound and microbubbles*. J Control Release, 2022. **341**: p. 605-615.
21. Morse, S.V., A.N. Pouliopoulos, T.G. Chan, M.J. Copping, J. Lin, N.J. Long, and J.J. Choi, *Rapid Short-pulse Ultrasound Delivers Drugs Uniformly across the Murine Blood-Brain Barrier with Negligible Disruption*. Radiology, 2019. **291**(2): p. 459-466.
22. Olumolade, O.O., S. Wang, G. Samiotaki, and E.E. Konofagou, *Longitudinal Motor and Behavioral Assessment of Blood-Brain Barrier Opening with Transcranial Focused Ultrasound*. Ultrasound Med Biol, 2016. **42**(9): p. 2270-82.
23. Omata, D., et al., *Effects of encapsulated gas on stability of lipid-based microbubbles and ultrasound-triggered drug delivery*. J Control Release, 2019. **311-312**: p. 65-73.
24. Raymond, S.B., J. Skoch, K. Hynynen, and B.J. Bacskai, *Multiphoton imaging of ultrasound/Optison mediated cerebrovascular effects in vivo*. J Cereb Blood Flow Metab, 2007. **27**(2): p. 393-403.
25. Raymond, S.B., L.H. Treat, J.D. Dewey, N.J. McDannold, K. Hynynen, and B.J. Bacskai, *Ultrasound enhanced delivery of molecular imaging and therapeutic agents in Alzheimer's disease mouse models*. PLoS One, 2008. **3**(5): p. e2175.
26. Samiotaki, G., F. Vlachos, Y.S. Tung, and E.E. Konofagou, *A quantitative pressure and microbubble-size dependence study of focused ultrasound-induced blood-brain barrier opening reversibility in vivo using MRI*. Magn Reson Med, 2012. **67**(3): p. 769-77.
27. Shen, Y., J. Guo, G. Chen, C.T. Chin, X. Chen, J. Chen, F. Wang, S. Chen, and G. Dan, *Delivery of liposomes with different sizes to mice brain after sonication by focused ultrasound in the presence of microbubbles*. Ultrasound in Medicine and Biology, 2016. **42**(7): p. 1499-1511.
28. Sierra, C., C. Acosta, C. Chen, S.Y. Wu, M.E. Karakatsani, M. Bernal, and E.E. Konofagou, *Lipid microbubbles as a vehicle for targeted drug delivery using focused ultrasound-induced blood-brain barrier opening*. J Cereb Blood Flow Metab, 2017. **37**(4): p. 1236-1250.
29. Vlachos, F., Y.S. Tung, and E. Konofagou, *Permeability dependence study of the focused ultrasound-induced blood-brain barrier opening at distinct pressures and microbubble diameters using DCE-MRI*. Magn Reson Med, 2011. **66**(3): p. 821-30.

30. Wu, S.K., C.F. Chiang, Y.H. Hsu, T.H. Lin, H.C. Liou, W.M. Fu, and W.L. Lin, *Short-time focused ultrasound hyperthermia enhances liposomal doxorubicin delivery and antitumor efficacy for brain metastasis of breast cancer*. *Int J Nanomedicine*, 2014. **9**: p. 4485-94.
31. Zhang, D.Y., et al., *Ultrasound-mediated Delivery of Paclitaxel for Glioma: A Comparative Study of Distribution, Toxicity, and Efficacy of Albumin-bound Versus Cremophor Formulations*. *Clin Cancer Res*, 2020. **26**(2): p. 477-486.
32. Zhao, B., Y. Chen, J. Liu, L. Zhang, J. Wang, Y. Yang, Q. Lv, and M. Xie, *Blood-brain barrier disruption induced by diagnostic ultrasound combined with microbubbles in mice*. *Oncotarget*, 2018. **9**(4): p. 4897-4914.
33. Alli, S., et al., *Brainstem blood brain barrier disruption using focused ultrasound: A demonstration of feasibility and enhanced doxorubicin delivery*. *J Control Release*, 2018. **281**: p. 29-41.
34. Aryal, M., K. Fischer, C. Gentile, S. Gitto, Y.Z. Zhang, and N. McDannold, *Effects on P-Glycoprotein Expression after Blood-Brain Barrier Disruption Using Focused Ultrasound and Microbubbles*. *PLoS One*, 2017. **12**(1): p. e0166061.
35. Aryal, M., J. Park, N. Vykhodtseva, Y.Z. Zhang, and N. McDannold, *Enhancement in blood-tumor barrier permeability and delivery of liposomal doxorubicin using focused ultrasound and microbubbles: evaluation during tumor progression in a rat glioma model*. *Phys Med Biol*, 2015. **60**(6): p. 2511-2527.
36. Aryal, M., N. Vykhodtseva, Y.Z. Zhang, and N. McDannold, *Multiple sessions of liposomal doxorubicin delivery via focused ultrasound mediated blood-brain barrier disruption: a safety study*. *J Control Release*, 2015. **204**: p. 60-69.
37. Aslund, A.K., S. Snipstad, A. Healey, S. Kvale, S.H. Torp, P.C. Sontum, C.L. Davies, and A. van Wamel, *Efficient Enhancement of Blood-Brain Barrier Permeability Using Acoustic Cluster Therapy (ACT)*. *Theranostics*, 2017. **7**(1): p. 23-30.
38. Cho, H.S., H. Lee, M. Han, J.R. Choi, T. Lee, S. Ahn, Y. Chang, and J. Park, *Localised down-regulation of p-glycoprotein by Focused Ultrasound and Microbubbles induced Blood-Brain Barrier Disruption in Rat Brain* *Journal of Therapeutic Ultrasound*, 2016. **5** (Supplement 1): p. 16-17.
39. Chopra, R., N. Vykhodtseva, and K. Hynynen, *Influence of exposure time and pressure amplitude on blood-brain-barrier opening using transcranial ultrasound exposures*. *ACS Chem Neurosci*, 2010. **1**(5): p. 391-398.
40. Fan, C.H., Y.H. Cheng, C.Y. Ting, Y.J. Ho, P.H. Hsu, H.L. Liu, and C.K. Yeh, *Ultrasound/Magnetic Targeting with SPIO-DOX-Microbubble Complex for Image-Guided Drug Delivery in Brain Tumors*. *Theranostics*, 2016. **6**(10): p. 1542-56.
41. Fan, C.H., H.L. Liu, C.Y. Ting, Y.H. Lee, C.Y. Huang, Y.J. Ma, K.C. Wei, T.C. Yen, and C.K. Yeh, *Submicron-bubble-enhanced focused ultrasound for blood-brain barrier disruption and improved CNS drug delivery*. *PLoS One*, 2014. **9**(5): p. e96327.
42. Fan, C.H., C.Y. Ting, Y.C. Chang, K.C. Wei, H.L. Liu, and C.K. Yeh, *Drug-loaded bubbles with matched focused ultrasound excitation for concurrent blood-brain barrier opening and brain-tumor drug delivery*. *Acta Biomater*, 2015. **15**: p. 89-101.
43. Goutal, S., M. Gerstenmayer, S. Auvity, F. Caille, S. Meriaux, I. Buvat, B. Larrat, and N. Tournier, *Physical blood-brain barrier disruption induced by focused ultrasound does not overcome the transporter-mediated efflux of erlotinib*. *Journal of Controlled Release*, 2018. **292**: p. 210-220.

44. Han, M., H. Seo, H. Choi, E.H. Lee, and J. Park, *Localized Modification of Water Molecule Transport After Focused Ultrasound-Induced Blood-Brain Barrier Disruption in Rat Brain*. Front Neurosci, 2021. **15**: p. 685977.
45. Huh, H., et al., *A local difference in blood-brain barrier permeability in the caudate putamen and thalamus of a rat brain induced by focused ultrasound*. Sci Rep, 2020. **10**(1): p. 19286.
46. Jung, B., H. Huh, E.H. Lee, M. Han, and J. Park, *An advanced focused ultrasound protocol improves the blood-brain barrier permeability and doxorubicin delivery into the rat brain*. J Control Release, 2019. **315**: p. 55-64.
47. Kobus, T., N. Vykhodtseva, M. Pilatou, Y. Zhang, and N. McDannold, *Safety Validation of Repeated Blood-Brain Barrier Disruption Using Focused Ultrasound*. Ultrasound Med Biol, 2016. **42**(2): p. 481-92.
48. Kovacs, Z.I., S. Kim, N. Jikaria, F. Qureshi, B. Milo, B.K. Lewis, M. Bresler, S.R. Burks, and J.A. Frank, *Disrupting the blood-brain barrier by focused ultrasound induces sterile inflammation*. Proc Natl Acad Sci U S A, 2017. **114**(1): p. E75-e84.
49. Kovacs, Z.I., T.W. Tu, M. Sundby, F. Qureshi, B.K. Lewis, N. Jikaria, S.R. Burks, and J.A. Frank, *MRI and histological evaluation of pulsed focused ultrasound and microbubbles treatment effects in the brain*. Theranostics, 2018. **8**(17): p. 4837-4855.
50. Liu, H.L., P.H. Hsu, P.C. Chu, Y.Y. Wai, J.C. Chen, C.R. Shen, T.C. Yen, and J.J. Wang, *Magnetic resonance imaging enhanced by superparamagnetic iron oxide particles: usefulness for distinguishing between focused ultrasound-induced blood-brain barrier disruption and brain hemorrhage*. J Magn Reson Imaging, 2009. **29**(1): p. 31-8.
51. Liu, H.L., et al., *Blood-brain barrier disruption with focused ultrasound enhances delivery of chemotherapeutic drugs for glioblastoma treatment*. Radiology, 2010. **255**(2): p. 415-425.
52. Liu, H.L., C.H. Pan, C.Y. Ting, and M.J. Hsiao, *Opening of the blood-brain barrier by low-frequency (28-kHz) ultrasound: a novel pinhole-assisted mechanical scanning device*. Ultrasound Med Biol, 2010. **36**(2): p. 325-35.
53. Liu, H.L., Y.Y. Wai, W.S. Chen, J.C. Chen, P.H. Hsu, X.Y. Wu, W.C. Huang, T.C. Yen, and J.J. Wang, *Hemorrhage detection during focused-ultrasound induced blood-brain-barrier opening by using susceptibility-weighted magnetic resonance imaging*. Ultrasound Med Biol, 2008. **34**(4): p. 598-606.
54. Liu, H.L., Y.Y. Wai, P.H. Hsu, L.A. Lyu, J.S. Wu, C.R. Shen, J.C. Chen, T.C. Yen, and J.J. Wang, *In vivo assessment of macrophage CNS infiltration during disruption of the blood-brain barrier with focused ultrasound: a magnetic resonance imaging study*. J Cereb Blood Flow Metab, 2010. **30**(1): p. 177-186.
55. Marty, B., et al., *Dynamic study of blood-brain barrier closure after its disruption using ultrasound: a quantitative analysis*. J Cereb Blood Flow Metab, 2012. **32**(10): p. 1948-1958.
56. McDannold, N., Y. Zhang, J.G. Supko, C. Power, T. Sun, C. Peng, N. Vykhodtseva, A.J. Golby, and D.A. Reardon, *Acoustic feedback enables safe and reliable carboplatin delivery across the blood-brain barrier with a clinical focused ultrasound system and improves survival in a rat glioma model*. Theranostics, 2019. **9**(21): p. 6284-6299.

57. McDannold, N., Y. Zhang, J.G. Supko, C. Power, T. Sun, N. Vykhodtseva, A.J. Golby, and D.A. Reardon, *Blood-brain barrier disruption and delivery of irinotecan in a rat model using a clinical transcranial MRI-guided focused ultrasound system*. Sci Rep, 2020. **10**(1): p. 8766.
58. McDannold, N., Y. Zhang, and N. Vykhodtseva, *Blood-brain barrier disruption and vascular damage induced by ultrasound bursts combined with microbubbles can be influenced by choice of anesthesia protocol*. Ultrasound Med Biol, 2011. **37**(8): p. 1259-1270.
59. McMahon, D. and K. Hynynen, *Acute Inflammatory Response Following Increased Blood-Brain Barrier Permeability Induced by Focused Ultrasound is Dependent on Microbubble Dose*. Theranostics, 2017. **7**(16): p. 3989-4000.
60. McMahon, D., A. Lassus, E. Gaud, V. Jeannot, and K. Hynynen, *Microbubble formulation influences inflammatory response to focused ultrasound exposure in the brain*. Sci Rep, 2020. **10**(1): p. 21534.
61. McMahon, D., W. Oakden, and K. Hynynen, *Investigating the effects of dexamethasone on blood-brain barrier permeability and inflammatory response following focused ultrasound and microbubble exposure*. Theranostics, 2020. **10**(4): p. 1604-1618.
62. O'Reilly, M.A., O. Hough, and K. Hynynen, *Blood-Brain Barrier Closure Time After Controlled Ultrasound-Induced Opening Is Independent of Opening Volume*. J Ultrasound Med, 2017. **36**(3): p. 475-483.
63. O'Reilly, M.A., A.C. Waspe, M. Ganguly, and K. Hynynen, *Focused-ultrasound disruption of the blood-brain barrier using closely-timed short pulses: influence of sonication parameters and injection rate*. Ultrasound Med Biol, 2011. **37**(4): p. 587-94.
64. Park, J., M. Aryal, N. Vykhodtseva, Y.Z. Zhang, and N. McDannold, *Evaluation of permeability, doxorubicin delivery, and drug retention in a rat brain tumor model after ultrasound-induced blood-tumor barrier disruption*. J Control Release, 2017. **250**: p. 77-85.
65. Park, J., Y. Zhang, N. Vykhodtseva, F.A. Jolesz, and N.J. McDannold, *The kinetics of blood brain barrier permeability and targeted doxorubicin delivery into brain induced by focused ultrasound*. J Control Release, 2012. **162**(1): p. 134-142.
66. Shin, J., C. Kong, J.S. Cho, J. Lee, C.S. Koh, M.S. Yoon, Y.C. Na, W.S. Chang, and J.W. Chang, *Focused ultrasound-mediated noninvasive blood-brain barrier modulation: preclinical examination of efficacy and safety in various sonication parameters*. Neurosurg Focus, 2018. **44**(2): p. E15.
67. Song, K.H., A.C. Fan, J.J. Hinkle, J. Newman, M.A. Borden, and B.K. Harvey, *Microbubble gas volume: A unifying dose parameter in blood-brain barrier opening by focused ultrasound*. Theranostics, 2017. **7**(1): p. 144-152.
68. Treat, L.H., N. McDannold, N. Vykhodtseva, Y. Zhang, K. Tam, and K. Hynynen, *Targeted delivery of doxorubicin to the rat brain at therapeutic levels using MRI-guided focused ultrasound*. Int J Cancer, 2007. **121**(4): p. 901-7.
69. Tsai, H.C., C.H. Tsai, W.S. Chen, C. Inserra, K.C. Wei, and H.L. Liu, *Safety evaluation of frequent application of microbubble-enhanced focused ultrasound blood-brain-barrier opening*. Sci Rep, 2018. **8**(1): p. 17720.
70. Wei, K.C., et al., *Focused ultrasound-induced blood-brain barrier opening to enhance temozolomide delivery for glioblastoma treatment: a preclinical study*. PLoS One, 2013. **8**(3): p. e58995.
71. Wu, S.K., P.C. Chu, W.Y. Chai, S.T. Kang, C.H. Tsai, C.H. Fan, C.K. Yeh, and H.L. Liu, *Characterization of Different Microbubbles in Assisting Focused Ultrasound-Induced Blood-Brain Barrier Opening*. Sci Rep, 2017. **7**: p. 46689.

72. Yang, F.Y., C.C. Chen, Y.H. Kao, C.L. Chen, C.E. Ko, S.C. Horng, and R.C. Chen, *Evaluation of Dose Distribution of Molecular Delivery After Blood-Brain Barrier Disruption by Focused Ultrasound with Treatment Planning*. *Ultrasound in Medicine and Biology*, 2013. **39**(4): p. 620-627.
73. Yang, F.Y., C.E. Ko, S.Y. Huang, I.F. Chung, and G.S. Chen, *Pharmacokinetic changes induced by focused ultrasound in glioma-bearing rats as measured by dynamic contrast-enhanced MRI*. *PLoS ONE*, 2014. **9** (3) (no pagination)(e92910).
74. Yang, F.Y. and P.Y. Lee, *Efficiency of drug delivery enhanced by acoustic pressure during blood-brain barrier disruption induced by focused ultrasound*. *Int J Nanomedicine*, 2012. **7**: p. 2573-2582.
75. Yang, F.Y., Y.S. Lin, K.H. Kang, and T.K. Chao, *Reversible blood-brain barrier disruption by repeated transcranial focused ultrasound allows enhanced extravasation*. *J Control Release*, 2011. **150**(1): p. 111-116.
76. Yang, F.Y., H.E. Wang, G.L. Lin, H.H. Lin, and T.T. Wong, *Evaluation of the increase in permeability of the blood-brain barrier during tumor progression after pulsed focused ultrasound*. *Int J Nanomedicine*, 2012. **7**: p. 723-30.
77. Zhang, Y., et al., *Non-Invasive, Focal Disconnection of Brain Circuitry Using Magnetic Resonance-Guided Low-Intensity Focused Ultrasound to Deliver a Neurotoxin*. *Ultrasound in Medicine and Biology*, 2016. **42**(9): p. 2261-2269.
78. Beccaria, K., et al., *Opening of the blood-brain barrier with an unfocused ultrasound device in rabbits*. *J Neurosurg*, 2013. **119**(4): p. 887-98.
79. Hynynen, K., N. McDannold, N. Vykhodtseva, S. Raymond, R. Weissleder, F.A. Jolesz, and N. Sheikov, *Focal disruption of the blood-brain barrier due to 260-kHz ultrasound bursts: a method for molecular imaging and targeted drug delivery*. *J Neurosurg*, 2006. **105**(3): p. 445-454.
80. McDannold, N., N. Vykhodtseva, and K. Hynynen, *Targeted disruption of the blood-brain barrier with focused ultrasound: association with cavitation activity*. *Phys Med Biol*, 2006. **51**(4): p. 793-807.
81. McDannold, N., N. Vykhodtseva, and K. Hynynen, *Use of Ultrasound Pulses Combined with Definity for Targeted Blood-Brain Barrier Disruption: A Feasibility Study*. *Ultrasound in Medicine and Biology*, 2007. **33**(4): p. 584-590.
82. McDannold, N., N. Vykhodtseva, and K. Hynynen, *Blood-brain barrier disruption induced by focused ultrasound and circulating preformed microbubbles appears to be characterized by the mechanical index*. *Ultrasound Med Biol*, 2008. **34**(5): p. 834-840.
83. McDannold, N., N. Vykhodtseva, and K. Hynynen, *Effects of acoustic parameters and ultrasound contrast agent dose on focused-ultrasound induced blood-brain barrier disruption*. *Ultrasound Med Biol*, 2008. **34**(6): p. 930-937.
84. Mei, J., Y. Cheng, Y. Song, Y. Yang, F. Wang, Y. Liu, and Z. Wang, *Experimental study on targeted methotrexate delivery to the rabbit brain via magnetic resonance imaging-guided focused ultrasound*. *Journal of Ultrasound in Medicine*, 2009. **28**(7): p. 871-880.
85. Wang, F., Y. Cheng, J. Mei, Y. Song, Y.Q. Yang, Y. Liu, and Z. Wang, *Focused ultrasound microbubble destruction-mediated changes in blood-brain barrier permeability assessed by contrast-enhanced magnetic resonance imaging*. *J Ultrasound Med*, 2009. **28**(11): p. 1501-1509.

86. O'Reilly, M.A., R.M. Jones, E. Barrett, A. Schwab, E. Head, and K. Hynynen, *Investigation of the Safety of Focused Ultrasound-Induced Blood-Brain Barrier Opening in a Natural Canine Model of Aging*. *Theranostics*, 2017. **7**(14): p. 3573-3584.
87. Liu, H.L., et al., *In vivo MR quantification of superparamagnetic iron oxide nanoparticle leakage during low-frequency-ultrasound-induced blood-brain barrier opening in swine*. *J Magn Reson Imaging*, 2011. **34**(6): p. 1313-1324.
88. Pelekanos, M., G. Leinenga, M. Odabae, S. Saifzadeh, R. Steck, and J. Gotz, *Establishing sheep as an experimental species to validate ultrasound-mediated blood-brain barrier opening for potential therapeutic interventions*. *Theranostics*, 2018. **8**(9): p. 2583-2602.
89. Yoon, K., W. Lee, E. Chen, J.E. Lee, P. Croce, A. Cammalleri, L. Foley, A.L. Tsao, and S.S. Yoo, *Localized Blood-Brain Barrier Opening in Ovine Model Using Image-Guided Transcranial Focused Ultrasound*. *Ultrasound Med Biol*, 2019. **45**(9): p. 2391-2404.
90. Arvanitis, C.D., M.S. Livingstone, N. Vykhodtseva, and N. McDannold, *Controlled ultrasound-induced blood-brain barrier disruption using passive acoustic emissions monitoring*. *PLoS One*, 2012. **7**(9): p. e45783.
91. Downs, M.E., A. Buch, M.E. Karakatsani, E.E. Konofagou, and V.P. Ferrera, *Blood-Brain Barrier Opening in Behaving Non-Human Primates via Focused Ultrasound with Systemically Administered Microbubbles*. *Sci Rep*, 2015. **5**: p. 15076.
92. Downs, M.E., A. Buch, C. Sierra, M.E. Karakatsani, T. Teichert, S. Chen, E.E. Konofagou, and V.P. Ferrera, *Long-Term Safety of Repeated Blood-Brain Barrier Opening via Focused Ultrasound with Microbubbles in Non-Human Primates Performing a Cognitive Task*. *PLoS One*, 2015. **10**(5): p. e0125911.
93. Goldwirt, L., M. Canney, C. Horodyckid, J. Poupon, S. Mourah, A. Vignot, J.Y. Chapelon, and A. Carpentier, *Enhanced brain distribution of carboplatin in a primate model after blood-brain barrier disruption using an implantable ultrasound device*. *Cancer Chemother Pharmacol*, 2016. **77**(1): p. 211-6.
94. Horodyckid, C., et al., *Safe long-term repeated disruption of the blood-brain barrier using an implantable ultrasound device: a multiparametric study in a primate model*. *J Neurosurg*, 2017. **126**(4): p. 1351-1361.
95. Marquet, F., T. Teichert, S.Y. Wu, Y.S. Tung, M. Downs, S. Wang, C. Chen, V. Ferrera, and E.E. Konofagou, *Real-time, transcranial monitoring of safe blood-brain barrier opening in non-human primates*. *PLoS One*, 2014. **9**(2): p. e84310.
96. Marquet, F., Y.S. Tung, T. Teichert, V.P. Ferrera, and E.E. Konofagou, *Noninvasive, transient and selective blood-brain barrier opening in non-human primates in vivo*. *PLoS One*, 2011. **6**(7): p. e22598.
97. McDannold, N., C.D. Arvanitis, N. Vykhodtseva, and M.S. Livingstone, *Temporary disruption of the blood-brain barrier by use of ultrasound and microbubbles: safety and efficacy evaluation in rhesus macaques*. *Cancer Res*, 2012. **72**(14): p. 3652-3663.
98. Pouliopoulos, A.N., S.Y. Wu, M.T. Burgess, M.E. Karakatsani, H.A.S. Kamimura, and E.E. Konofagou, *A Clinical System for Non-invasive Blood-Brain Barrier Opening Using a Neuronavigation-Guided Single-Element Focused Ultrasound Transducer*. *Ultrasound Med Biol*, 2020. **46**(1): p. 73-89.
99. Wu, S.Y., C.S. Sanchez, G. Samiotaki, A. Buch, V.P. Ferrera, and E.E. Konofagou, *Characterizing Focused-Ultrasound Mediated Drug Delivery to the Heterogeneous Primate Brain In Vivo with Acoustic Monitoring*. *Sci Rep*, 2016. **6**: p. 37094.

100. Abrahao, A., et al., *First-in-human trial of blood-brain barrier opening in amyotrophic lateral sclerosis using MR-guided focused ultrasound*. Nat Commun, 2019. **10**(1): p. 4373.
101. Anastasiadis, P., D. Gandhi, Y. Guo, A.K. Ahmed, S.M. Bentzen, C. Arvanitis, and G.F. Woodworth, *Localized blood-brain barrier opening in infiltrating gliomas with MRI-guided acoustic emissions-controlled focused ultrasound*. Proc Natl Acad Sci U S A, 2021. **118**(37).
102. Chen, K.T., et al., *Neuronavigation-guided focused ultrasound for transcranial blood-brain barrier opening and immunostimulation in brain tumors*. Sci Adv, 2021. **7**(6).
103. Gasca-Salas, C., et al., *Blood-brain barrier opening with focused ultrasound in Parkinson's disease dementia*. Nat Commun, 2021. **12**(1): p. 779.
104. Idhah, A., et al., *Safety and Feasibility of Repeated and Transient Blood-Brain Barrier Disruption by Pulsed Ultrasound in Patients with Recurrent Glioblastoma*. Clin Cancer Res, 2019. **25**(13): p. 3793-3801.
105. Lipsman, N., et al., *Blood-brain barrier opening in Alzheimer's disease using MR-guided focused ultrasound*. Nat Commun, 2018. **9**(1): p. 2336.
106. Mainprize, T., et al., *Blood-Brain Barrier Opening in Primary Brain Tumors with Non-invasive MR-Guided Focused Ultrasound: A Clinical Safety and Feasibility Study*. Sci Rep, 2019. **9**(1): p. 321.
107. Park, S.H., M.J. Kim, H.H. Jung, W.S. Chang, H.S. Choi, I. Rachmilevitch, E. Zadicario, and J.W. Chang, *Safety and feasibility of multiple blood-brain barrier disruptions for the treatment of glioblastoma in patients undergoing standard adjuvant chemotherapy*. J Neurosurg, 2020: p. 1-9.
